# Supplementary material for: Genome sequencing elucidates Sardinian genetic architecture and augments association analyses for lipid and blood inflammatory markers
Source: Springer Nature journal article supplement (doi:10.1038/ng.3368), 2015-09-14

# Supplementary Materials

## Summary

|                                                                                                                                          |               |
|------------------------------------------------------------------------------------------------------------------------------------------|---------------|
| <b>SUPPLEMENTARY NOTE</b>                                                                                                                | <b>2</b>      |
| <b>SUPPLEMENTARY TABLES</b>                                                                                                              | <b>4</b>      |
| SUPPLEMENTARY TABLE 1. Quality assessment, through comparison with deep sequenced samples                                                | 4             |
| SUPPLEMENTARY TABLE 2. Quality assessment, through comparison with genotyping array results                                              | 5             |
| SUPPLEMENTARY TABLE 3. Shared haplotype length around variants with different frequency                                                  | 6             |
| SUPPLEMENTARY TABLE 4. Descriptive statistics for the SardinIA cohort                                                                    | 7             |
| SUPPLEMENTARY TABLE 5. Reported loci associated with lipid levels                                                                        | 9             |
| SUPPLEMENTARY TABLE 6. Estimated genome-wide significance thresholds for single marker tests                                             | 10            |
| SUPPLEMENTARY TABLE 7. Gender specific effects at variants associated with lipid levels                                                  | 11            |
| SUPPLEMENTARY TABLE 8. Gender specific effects at variants associated with inflammatory markers                                          | 12            |
| SUPPLEMENTARY TABLE 9. Replication results                                                                                               | 13            |
| SUPPLEMENTARY TABLE 10. Validation of imputed variants newly associated with inflammatory markers.                                       | <b>Error!</b> |
| <b>Bookmark not defined.</b>                                                                                                             |               |
| SUPPLEMENTARY TABLE 11. Variants contributing to significant signals in the rare variant tests.                                          | 16            |
| SUPPLEMENTARY TABLE 12. Association signals based on 1000G imputation for lipid levels                                                   | 17            |
| SUPPLEMENTARY TABLE 13. Association signals based on 1000G imputation for the inflammatory markers                                       | 20            |
| SUPPLEMENTARY TABLE 14. CADD score at loci associated with lipid levels                                                                  | 21            |
| SUPPLEMENTARY TABLE 15. CADD score at loci associated with inflammatory markers                                                          | 22            |
| SUPPLEMENTARY TABLE 16. Variance explained by top hits for lipid levels                                                                  | 23            |
| SUPPLEMENTARY TABLE 17. Variance explained by top hits for the inflammatory markers                                                      | 24            |
| <b>SUPPLEMENTARY FIGURES</b>                                                                                                             | <b>25</b>     |
| SUPPLEMENTARY FIGURE 1. Average deleteriousness of variants                                                                              | 25            |
| SUPPLEMENTARY FIGURE 2. FST differentiation between Sardinians and other Europeans                                                       | 26            |
| SUPPLEMENTARY FIGURE 3. Principal component ancestry map                                                                                 | 27            |
| SUPPLEMENTARY FIGURE 4. Imputation accuracy comparisons                                                                                  | 28            |
| SUPPLEMENTARY FIGURE 5. Proportion of haplotypes with nearest neighbour in the Lanusei valley, as a function of grandparental birthplace | 29            |
| SUPPLEMENTARY FIGURE 6. Manhattan plots for studied traits                                                                               | 30            |
| SUPPLEMENTARY FIGURE 7. QQplots for all studied traits                                                                                   | 35            |
| SUPPLEMENTARY FIGURE 8. Regional association plots                                                                                       | 36            |
| SUPPLEMENTARY FIGURE 9. Extended associated region on chr12                                                                              | 37            |

## SUPPLEMENTARY NOTE

### Description of replication cohorts

**INGI-Val Borbera (INGI-VB):** The INGI-Val Borbera population is a collection of 1,785 genotyped samples collected in the Val Borbera Valley, a geographically isolated valley located within the Appennine Mountains in Northwest Italy (Traglia et al.). The valley is inhabited by about 3,000 descendants from the original population, living in 7 villages along the valley and in the mountains. Participants were healthy people 18-102 years of age that had at least one grandfather living in the valley. A standard battery of tests were performed by the laboratory of ASL 22 - Novi Ligure (AL) on sera from fasting blood collected in the morning. The project was approved by the Ethical Committee of the San Raffaele Hospital and of the Piemonte Region. All participants signed an informed consent. hsCRP was measured using turbidimetric analysis in a Beckman Coulter SYNCHRON.

**INGI-FVG:** The INGI Friuli Venezia Giulia (FVG) cohort comprises about 1,700 samples from six isolated villages covering a total area of 7858 km<sup>2</sup> in a hilly part of Friuli-Venezia Giulia (FVG) county located in North-Eastern Italy (Esko et al.). Genotyping and phenotypic data for 1,590 samples are available. Participants were randomly selected people 3-92 years of age. People with age < 18 were excluded from analyses. Ethics approval was obtained from the Ethics Committee of the Burlo Garofolo children hospital in Trieste. Written informed consent was obtained from every participant to the study.

**HELIC MANOLIS (HA):** The HELIC (Hellenic Isolated Cohorts; [www.helic.org](http://www.helic.org)) MANOLIS (Minoan Isolates) collection focuses on Anogia and surrounding Mylopotamos villages. Recruitment of this population-based sample was primarily carried out at the village medical centres. All individuals were older than 17 years and had to have at least one parent from the Mylopotamos area. The study includes biological sample collection for DNA extraction and lab-based blood measurements, and interview-based questionnaire filling. The phenotypes collected include anthropometric and biometric measurements, clinical evaluation data, biochemical and haematological profiles, self-reported medical history, demographic, socioeconomic and lifestyle information. The study was approved by the Harokopio University Bioethics Committee and informed consent was obtained from every participant. hsCRP was measured using an immunoturbidimetric assay on a COBAS 8000 analyser (Roche).

**HELIC Pomak (HP).** The HELIC (Hellenic Isolated Cohorts; [www.helic.org](http://www.helic.org)) Pomak collection focuses on the Pomak villages, a set of isolated mountainous villages in the North of Greece. Recruitment of this population-based sample was primarily carried out at the village medical centres. The study includes biological sample collection for DNA extraction and lab-based blood measurements, and interview-based questionnaire filling. The phenotypes collected include anthropometric and biometric measurements, clinical evaluation data, biochemical and haematological profiles, self-reported medical history, demographic, socioeconomic and lifestyle information. The study was approved by the Harokopio University Bioethics Committee and informed consent was obtained from every participant. hsCRP measurements were performed as in HA

**TwinsUK:** TwinsUK is a cohort of identical and non-identical twins living in the United Kingdom. Samples used here are those sequenced within the UK10K consortium. Only one individual for each pair of identical twins was used in the analysis.

**ALSPAC:** ALSPAC is a geographically based UK cohort that recruited pregnant women residing in Avon (Southwest England) with an expected date of delivery between April 1, 1991, and December 31, 1992. A total of 15,247 pregnancies were enrolled, with 14,775 children born (see [www.alspac.bris.ac.uk](http://www.alspac.bris.ac.uk)). Samples used here are those sequenced within the UK10K consortium. Blood samples were collected from nonfasting participants and were immediately spun and frozen at  $-80^{\circ}\text{C}$ . Inflammatory markers were assayed in 2008 after a median of 7.5 years in storage with no previous freeze-thaw cycles during this period. Interleukin 6 was measured by enzyme-linked immunosorbent assay (R&D Systems), and high-sensitivity CRP was measured by automated particle-enhanced immunoturbidimetric assay (Roche) (eMethods in the Supplement). All interassay coefficients of variation were less than 5%.

**INCIPE:** For the INCIPE study, 6,200 randomly chosen individuals, all Caucasians and at least 40 years of age as of 1 January 2006, received a letter inviting them to participate in the study. A total of 3,870 subjects (62%) accepted and were enrolled. Two studies were included in the analysis:

1. INCIPE1: Individuals genotyped on HumanOmniExpress-12 v1.1 Illumina
2. INCIPE2: Individuals genotyped on HumanCoreExome-12v1

The ethics committees of the involved institutions approved the study protocol. Lipid measurements: Enzymatic determination of cholesterol and triglycerides was performed on Dimension RxL apparatus (Siemens Diagnostics). High sensitive serum C-reactive protein (HS-CRP) levels were measured using high-sensitivity immunonephelometry (Dade Behring, Marburg, Germany) according to the manufacturer's protocol

## SUPPLEMENTARY TABLES

### SUPPLEMENTARY TABLE 1. Quality assessment, through comparison with deep sequenced samples

To evaluate the quality of low pass sequencing results, we deep sequenced a nuclear family to average depth of >65-fold per individual (father 65-fold, mother 85-fold, child 82-fold). In the table below, we compare deep sequencing results with low pass results, stratified by allele frequency.

| Grouping                                                                                          | Number of Variant Sites | Low pass results                 |                                                    |                                                        |
|---------------------------------------------------------------------------------------------------|-------------------------|----------------------------------|----------------------------------------------------|--------------------------------------------------------|
|                                                                                                   |                         | Monomorphic Sites<br>% (N sites) | Overall Genotype<br>Discordance<br>% (N genotypes) | Overall Heterozygote<br>Discordance<br>% (N genotypes) |
| <b>All variants discovered by deep sequencing</b>                                                 |                         |                                  |                                                    |                                                        |
| All variants.                                                                                     | 4,105,003               | 0.24% (N = 10,302)               | 0.38% (N = 12,315,009)                             | 0.71% (N = 5,558,176)                                  |
| <b>All variants discovered by deep sequencing, stratified by frequency among low pass samples</b> |                         |                                  |                                                    |                                                        |
| Frequency < 0.5%                                                                                  | 54,781                  | 3.70% (N = 2,029)                | 4.32% (N = 164,343)                                | 8.11% (N = 83,113)                                     |
| Frequency 0.5 – 5.0%                                                                              | 306,449                 | 0.69% (N = 2,138)                | 0.97% (N = 919,347)                                | 1.55% (N = 467,188)                                    |
| Frequency > 5%                                                                                    | 3,743,773               | 0.14% (N = 5,586)                | 0.27% (N = 11,231,319)                             | 0.51% (N = 5,007,875)                                  |

## SUPPLEMENTARY TABLE 2. Quality assessment, through comparison with genotyping array results

| Grouping                                                                                    | Number of Variants in the Genotyping Arrays | Number of Variants Also Found by Sequencing | Low pass results                           |                                     |                                          |
|---------------------------------------------------------------------------------------------|---------------------------------------------|---------------------------------------------|--------------------------------------------|-------------------------------------|------------------------------------------|
|                                                                                             |                                             |                                             | Missed In Sequence Analysis % (N variants) | Overall Discordance % (N genotypes) | Heterozygote Discordance % (N genotypes) |
| <b>All variants genotyped using arrays.</b>                                                 |                                             |                                             |                                            |                                     |                                          |
| All variants.                                                                               | 851,655                                     | 831,771                                     | 2.33% (N = 19,884)                         | 0.22% (N = 886,640,361)             | 0.23% (N = 261,628,802)                  |
| <b>All variants genotyped using arrays, stratified by frequency among low pass samples.</b> |                                             |                                             |                                            |                                     |                                          |
| Frequency 0.05% Singletons                                                                  | 9,196                                       | 3,832                                       | 58.33% (N = 5,364)                         | 0.04% (N = 4,085,910)               | 24.92% (N = 4,473)                       |
| Frequency 0.1% Doubletons                                                                   | 10,044                                      | 5,851                                       | 41.75% (N = 4,193)                         | 0.03% (N = 6,239,915)               | 6.19% (N = 11,074)                       |
| Frequency < 0.5% (including singletons and doubletons)                                      | 40,725                                      | 28,194                                      | 30.77% (N=12,531)                          | 0.05% (N = 31,562,620)              | 4.31% (N = 134,683)                      |
| Frequency 0.5 – 5.0%                                                                        | 101,462                                     | 100,321                                     | 1.12% (N=1,141)                            | 0.10% (N = 119,266,141)             | 0.51% (N = 5,940,571)                    |
| Frequency > 5%                                                                              | 709,468                                     | 703,256                                     | 0.88% (N=19,884)                           | 0.25% (N = 735,811,600)             | 0.22% (N = 255,553,548)                  |

### SUPPLEMENTARY TABLE 3. Shared haplotype length around variants with different frequency

Length of shared haplotypes surrounding variants with increasing allele count (from 2 to 5) shared between one of our 2,120 sequenced individuals and one of 100 individuals from the Lanusei Valley, or one of our 2,120 sequenced individuals and 100 from the CSCT cohort. The subset of 100 samples were randomly selected for each group.

| Alternative allele count | Shared with 100 Lanusei Valley samples | Shared with 100 CSCT samples |
|--------------------------|----------------------------------------|------------------------------|
| 2                        | 1,185 Kb                               | 717 Kb                       |
| 3                        | 370 Kb                                 | 325 Kb                       |
| 4                        | 255 Kb                                 | 213 Kb                       |
| 5                        | 188 Kb                                 | 155 Kb                       |

## SUPPLEMENTARY TABLE 4. Descriptive statistics for the SardiNIA cohort

The table shows summary statistics for the 6,602 samples that were fully genotyped.

| Characteristics      | Value              |                       |
|----------------------|--------------------|-----------------------|
| N males/N females    | 2,823/3,779        |                       |
| Age - mean (min-max) | 43.5 (14 - 101.3)  |                       |
| BMI - mean (min-max) | 25.3 (13.9 - 53.3) |                       |
| Smokers (N)          | 1247               |                       |
| LDL-c (mg/dl)        | N males/N females  | 2,502/3,379           |
|                      | mean (min-max)     | 125.5 (27.9 - 293.3)  |
| TG (mg/dl)           | N males/N females  | 2,505/3,380           |
|                      | mean (min-max)     | 87.7 (12.66 - 1608.1) |
| TC (mg/dl)           | N males/N females  | 2,505/3,380           |
|                      | mean (min-max)     | 208 (79.6 - 445.0)    |
| HDL (mg/dl)          | N males/N females  | 2,505/3,380           |
|                      | mean (min-max)     | 64.2 (21.3 - 147.6)   |
| ADPN (mg/ml)         | N males/N females  | 2,486 / 3,350         |
|                      | mean (min-max)     | 2.8 (0.2 - 46.4)      |
| hsCRP (ng/ml)        | N males/N females  | 2,411 / 3,219         |
|                      | mean (min-max)     | 2.7 (0.1 - 119)       |

|               |                   |                  |
|---------------|-------------------|------------------|
| ESR (mm/h)    | N males/N females | 2,531 / 3,410    |
|               | mean (min-max)    | 10.6 (1 - 110)   |
| MCP-1 (pg/ml) | N males/N females | 2,497 / 3,347    |
|               | mean (min-max)    | 282.9 (2 - 6080) |
| IL-6 (pg/L)   | N males/N females | 2,492 / 3,346    |
|               | mean (min-max)    | 3.2 (0.1 - 41)   |



## SUPPLEMENTARY TABLE 5. Reported loci associated with lipid levels

The table shows the association levels for the SNPs reported in (Teslovich et al, 2010 Nature. 2010 Aug 5;466(7307):707-13.) with pvalue between  $5 \times 10^{-5}$  and  $5 \times 10^{-8}$  in our study. Additionally, it reports association for the Sardinian specific variant rs72658864. Columns are defined as in **Table 2**.

| Candidate Gene | Chr:position | rs name     | Effect Allele / Other | Freq  | Effect (StdErr) | pvalue                | Variance Explained (%) | RSQR      | Variant Consequence |
|----------------|--------------|-------------|-----------------------|-------|-----------------|-----------------------|------------------------|-----------|---------------------|
| <b>LDL</b>     |              |             |                       |       |                 |                       |                        |           |                     |
| <i>APOB</i>    | 2:21384358   | rs5444450   | T/C                   | 0.178 | -0.171(0.032)   | $8.71 \times 10^{-8}$ | 0.5                    | 0.995     | Intergenic          |
| <i>ABCG5/8</i> | 2:44072576   | rs4299376   | G/T                   | 0.295 | 0.106(0.023)    | $2.74 \times 10^{-6}$ | 0.4                    | Genotyped | Intronic            |
| <i>OSBPL7</i>  | 17:4542511   | rs7206971   | G/A                   | 0.492 | -0.08(0.021)    | $2.76 \times 10^{-5}$ | 0.3                    | 0.999     | Intronic            |
| <i>LDLR</i>    | 19:11190873  | rs73015013  | T/C                   | 0.137 | -0.164(0.030)   | $6.35 \times 10^{-8}$ | 0.5                    | Genotyped | Intergenic          |
| <i>LDLR</i>    | 19:11227562  | rs72658864* | C/T                   | 0.005 | -0.633(0.150)   | $2.54 \times 10^{-5}$ | 0.5                    | Genotyped | Missense, V578A     |
| <b>TC</b>      |              |             |                       |       |                 |                       |                        |           |                     |
| <i>SORT1</i>   | 1:109818306  | rs629301    | G/T                   | 0.15  | -0.139(0.029)   | $2.48 \times 10^{-6}$ | 0.4                    | Genotyped | Intergenic          |
| <i>ABCG5/8</i> | 2:44072576   | rs5444450   | T/C                   | 0.295 | 0.097(0.023)    | $1.66 \times 10^{-5}$ | 0.3                    | Genotyped | Intronic            |
| <i>APOA1/5</i> | 11 116648917 | rs964184    | G/C                   | 0.096 | 0.149(0.036)    | $3.59 \times 10^{-5}$ | 0.3                    | Genotyped | 3' UTR              |
| <i>LDLR</i>    | 19:11202306  | rs6511720   | T/G                   | 0.129 | -0.135(0.031)   | $1.25 \times 10^{-5}$ | 0.3                    | Genotyped | Intronic            |
| <b>HDL</b>     |              |             |                       |       |                 |                       |                        |           |                     |
| <i>LPL</i>     | 8:19844222   | rs12678919  | G/A                   | 0.139 | 0.158(0.034)    | $3.62 \times 10^{-6}$ | 0.4                    | Genotyped | Intergenic          |
| <i>TTC39B</i>  | 9:15305378   | rs581080    | G/C                   | 0.276 | -0.106(0.024)   | $7.75 \times 10^{-6}$ | 0.3                    | Genotyped | Intronic            |
| <i>ABCA1</i>   | 9:107664301  | rs1883025   | T/C                   | 0.273 | -0.104(0.024)   | $1.52 \times 10^{-5}$ | 0.3                    | Genotyped | Intronic            |
| <b>TG</b>      |              |             |                       |       |                 |                       |                        |           |                     |
| <i>GCKR</i>    | 2:27730940   | rs1260326   | T/C                   | 0.458 | 0.114(0.021)    | $9.56 \times 10^{-8}$ | 0.5                    | Genotyped | Missense, L446P     |
| <i>MAP3K1</i>  | 5:55861786   | rs9686661   | T/C                   | 0.306 | 0.08(0.021)     | $4.79 \times 10^{-5}$ | 0.3                    | Genotyped | Intergenic          |

\*Association parameters reported for this marker refer to a model that includes rs73015013 as additional covariate

**SUPPLEMENTARY TABLE 6. Estimated genome-wide significance thresholds for single marker tests**

The tables show the estimated genome-wide significance threshold and the number of independent tests calculated for each phenotype scenario (see Methods) when using 300 (A) or 1000 (B) simulations.

| A)  | 300 simulations        |                     |                        |                     |
|-----|------------------------|---------------------|------------------------|---------------------|
|     | MAF>0%                 |                     | MAF>=0.5%              |                     |
|     | GW threshold           | N independent tests | GW threshold           | N independent tests |
| H2  |                        |                     |                        |                     |
| 20% | $8.88 \times 10^{-09}$ | 5,628,193           | $1.05 \times 10^{-08}$ | 4,757,072           |
| 40% | $6.41 \times 10^{-09}$ | 7,800,977           | $1.26 \times 10^{-08}$ | 3,953,082           |
| 70% | $4.65 \times 10^{-09}$ | 10,750,999          | $7.16 \times 10^{-09}$ | 6,980,950           |
| 0%  | $8.09 \times 10^{-09}$ | 6,177,286           | $1.01 \times 10^{-08}$ | 4,940,901           |

  

| B)  | 1000 simulations       |                     |                        |                     |
|-----|------------------------|---------------------|------------------------|---------------------|
|     | MAF>0%                 |                     | MAF>=0.5%              |                     |
|     | GW threshold           | N independent tests | GW threshold           | N independent tests |
| H2  |                        |                     |                        |                     |
| 20% | $1.13 \times 10^{-08}$ | 4,408,735           | $1.49 \times 10^{-08}$ | 3,351,741           |
| 40% | $7.83 \times 10^{-09}$ | 6,382,793           | $1.37 \times 10^{-08}$ | 3,653,381           |
| 70% | na                     | na                  | na                     | na                  |
| 0%  | $6.91 \times 10^{-09}$ | 7,239,653           | $1.40 \times 10^{-08}$ | 3,363,078           |

**SUPPLEMENTARY TABLE 7. Gender specific effects at variants associated with lipid levels**

The table shows the association parameters of the SNPs listed in **Table 2** when analysed in males and females separately. Columns are defined as in **Table 2**. SNPs showing significant heterogeneity (HetPval column) between genders are marked in bold.

| Chr:position                         | rs name           | Candidate Gene                      | Effect Allele<br>/ Other | Males        |                      |                                | Females      |                      |                                | HetPVal                        |
|--------------------------------------|-------------------|-------------------------------------|--------------------------|--------------|----------------------|--------------------------------|--------------|----------------------|--------------------------------|--------------------------------|
|                                      |                   |                                     |                          | Freq         | Effect (StdErr)      | pvalue                         | Freq         | Effect (StdErr)      | pvalue                         |                                |
| <b>LDL (2502 males/3379 females)</b> |                   |                                     |                          |              |                      |                                |              |                      |                                |                                |
| 1:55505647                           | rs11591147        | <i>PCSK9</i>                        | T/G                      | 0.036        | -0.430(0.078)        | 4.62 x 10 <sup>-08</sup>       | 0.039        | -0.423(0.066)        | 1.35 x 10 <sup>-10</sup>       | 0.946                          |
| 1:109821307                          | rs583104          | <i>SORT1</i>                        | G/T                      | 0.182        | -0.196(0.039)        | 5.21 x 10 <sup>-07</sup>       | 0.179        | -0.140(0.035)        | 7.30 x 10 <sup>-05</sup>       | 0.288                          |
| 11:5248004                           | rs11549407        | <i>HBB</i>                          | A/G                      | 0.050        | -0.548(0.072)        | 5.38 x 10 <sup>-14</sup>       | 0.046        | -0.390(0.065)        | 1.97 x 10 <sup>-09</sup>       | 0.105                          |
| <b>19:19456917</b>                   | <b>rs58489806</b> | <b><i>CILP2</i></b>                 | <b>T/C</b>               | <b>0.075</b> | <b>-0.358(0.057)</b> | <b>5.32 x 10<sup>-10</sup></b> | <b>0.073</b> | <b>-0.131(0.053)</b> | <b>0.013</b>                   | <b>3.57 x 10<sup>-03</sup></b> |
| 19:45412079                          | rs7412            | <i>APOE</i>                         | T/C                      | 0.032        | -0.552(0.083)        | 4.56 x 10 <sup>-11</sup>       | 0.041        | -0.689(0.065)        | 5.36 x 10 <sup>-26</sup>       | 0.194                          |
| 19:45411941                          | rs429358          | <i>APOE</i>                         | C/T                      | 0.077        | 0.231(0.056)         | 3.88 x 10 <sup>-05</sup>       | 0.072        | 0.362(0.050)         | 3.07 x 10 <sup>-13</sup>       | 0.080                          |
| <b>TC (2505 males/3380 females)</b>  |                   |                                     |                          |              |                      |                                |              |                      |                                |                                |
| 1:55505647                           | rs11591147        | <i>PCSK9</i>                        | T/G                      | 0.036        | -0.405(0.079)        | 3.35 x 10 <sup>-07</sup>       | 0.039        | -0.406(0.065)        | 6.02 x 10 <sup>-10</sup>       | 0.992                          |
| 4:41980435                           | -                 | <i>TMEM33, DCAF4L1,<br/>SLC30A9</i> | G/A                      | 0.011        | -0.523(0.140)        | 1.89 x 10 <sup>-04</sup>       | 0.014        | -0.579(0.111)        | 1.98 x 10 <sup>-07</sup>       | 0.754                          |
| 11:5248004                           | rs11549407        | <i>HBB</i>                          | A/G                      | 0.051        | -0.593(0.073)        | 6.15 x 10 <sup>-16</sup>       | 0.046        | -0.412(0.065)        | 2.02 x 10 <sup>-10</sup>       | 0.064                          |
| <b>19:19456917</b>                   | <b>rs58489806</b> | <b><i>CILP2</i></b>                 | <b>T/C</b>               | <b>0.075</b> | <b>-0.409(0.058)</b> | <b>2.40 x 10<sup>-12</sup></b> | <b>0.073</b> | <b>-0.156(0.052)</b> | <b>2.83 x 10<sup>-03</sup></b> | <b>1.24 x 10<sup>-03</sup></b> |
| 19:45412079                          | rs7412            | <i>APOE</i>                         | T/C                      | 0.032        | -0.479(0.084)        | 1.27 x 10 <sup>-08</sup>       | 0.041        | -0.573(0.065)        | 1.72 x 10 <sup>-18</sup>       | 0.375                          |
| 19:45411941                          | rs429358**        | <i>APOE</i>                         | C/T                      | 0.076        | 0.183(0.057)         | 1.22 x 10 <sup>-03</sup>       | 0.072        | 0.280(0.050)         | 1.76 x 10 <sup>-08</sup>       | 0.200                          |
| <b>HDL (2505 males/3380 females)</b> |                   |                                     |                          |              |                      |                                |              |                      |                                |                                |
| <b>8:19815256</b>                    | <b>rs286</b>      | <b><i>LPL</i></b>                   | <b>T/A</b>               | <b>0.125</b> | <b>0.257(0.046)</b>  | <b>2.70 x 10<sup>-08</sup></b> | <b>0.129</b> | <b>0.093(0.041)</b>  | <b>0.023</b>                   | <b>8.14 x 10<sup>-03</sup></b> |
| 15:58687603                          | rs174418          | <i>LIPC</i>                         | T/C                      | 0.470        | 0.181(0.029)         | 9.16 x 10 <sup>-10</sup>       | 0.465        | 0.116(0.026)         | 7.81 x 10 <sup>-06</sup>       | 0.103                          |
| 16: 56989590                         | rs247616          | <i>CETP</i>                         | T/C                      | 0.282        | 0.196(0.032)         | 1.65 x 10 <sup>-09</sup>       | 0.258        | 0.187(0.029)         | 2.02 x 10 <sup>-10</sup>       | 0.828                          |
| <b>18:3412386</b>                    | <b>rs8092903</b>  | <b><i>TGIF1</i></b>                 | <b>T/C</b>               | <b>0.027</b> | <b>-0.030(0.093)</b> | <b>0.746</b>                   | <b>0.026</b> | <b>-0.448(0.082)</b> | <b>4.49 x 10<sup>-08</sup></b> | <b>8.45 x 10<sup>-04</sup></b> |
| <b>TG (2505 males/3380 females)</b>  |                   |                                     |                          |              |                      |                                |              |                      |                                |                                |
| 8:19845376                           | rs7841189         | <i>LPL</i>                          | T/C                      | 0.201        | -0.226(0.038)        | 2.77 x 10 <sup>-09</sup>       | 0.215        | -0.103(0.034)        | 2.16 x 10 <sup>-03</sup>       | 0.0156                         |
| 11:116661101                         | -                 | <i>APOA5</i>                        | T/G                      | 0.026        | -0.422(0.091)        | 3.65 x 10 <sup>-06</sup>       | 0.024        | -0.551(0.086)        | 1.44 x 10 <sup>-10</sup>       | 0.304                          |
| 11:116664040                         | rs10750097        | <i>APOA5</i>                        | G/A                      | 0.174        | 0.188(0.040)         | 2.22 x 10 <sup>-06</sup>       | 0.170        | 0.170(0.036)         | 2.00 x 10 <sup>-06</sup>       | 0.734                          |
| 19:19456917                          | rs58489806        | <i>CILP2</i>                        | T/C                      | 0.075        | -0.341(0.057)        | 2.06 x 10 <sup>-09</sup>       | 0.073        | -0.200(0.052)        | 1.22 x 10 <sup>-04</sup>       | 0.068                          |

**SUPPLEMENTARY TABLE 8. Gender specific effects at variants associated with inflammatory markers**

The table shows the association parameters of the SNPs listed in **Table 3** when analysed in males and females separately. Columns are defined as in **Table 3**. SNPs showing significant heterogeneity (HetPval column) between genders are marked in bold.

| Chr:position                           | rs name            | Candidate<br>Gene   | Effect Allele /<br>Other | Males        |                       |                              | Females      |                       |                              | HetPVal                      |
|----------------------------------------|--------------------|---------------------|--------------------------|--------------|-----------------------|------------------------------|--------------|-----------------------|------------------------------|------------------------------|
|                                        |                    |                     |                          | Freq         | Effect (StdErr)       | pvalue                       | Freq         | Effect (StdErr)       | pvalue                       |                              |
| <b>ADPN (2486 males/3350 females)</b>  |                    |                     |                          |              |                       |                              |              |                       |                              |                              |
| 3:186559460                            | rs17300539         | ADIPOQ              | A/G                      | 0.165        | 0.277 (0.038)         | 5.15x10 <sup>-13</sup>       | 0.150        | 0.256 (0.034)         | 1.28x10 <sup>-13</sup>       | 0.687                        |
| 13:108884835                           | -                  | ABDH13              | A/G                      | 0.001        | -1.982 (0.521)        | 1.44x10 <sup>-04</sup>       | 0.001        | -1.426 (0.350)        | 4.68x10 <sup>-05</sup>       | 0.377                        |
| <b>hsCRP (2411 males/3219 females)</b> |                    |                     |                          |              |                       |                              |              |                       |                              |                              |
| 1:159684665                            | rs3091244          | CRP                 | A/G                      | 0.414        | 0.196 (0.028)         | 2.46x10 <sup>-12</sup>       | 0.439        | 0.229 (0.025)         | 3.11x10 <sup>-20</sup>       | 0.393                        |
| 8:17450500                             | rs73198138         | PDGFRL              | A/G                      | 0.005        | -0.899 (0.203)        | 9.55x10 <sup>-06</sup>       | 0.003        | -0.884 (0.213)        | 3.38x10 <sup>-05</sup>       | 0.960                        |
| <b>12:125533106</b>                    | <b>rs183233091</b> | <b>BRI3BP, AACS</b> | <b>A/G</b>               | <b>0.010</b> | <b>1.308 (0.134)</b>  | <b>3.57x10<sup>-22</sup></b> | <b>0.010</b> | <b>0.807 (0.125)</b>  | <b>1.25x10<sup>-10</sup></b> | <b>6.36x10<sup>-03</sup></b> |
| 12:121415293                           | rs7139079          | HNF1A               | G/A                      | 0.375        | -0.127 (0.029)        | 9.60x10 <sup>-06</sup>       | 0.379        | -0.134 (0.025)        | 1.19x10 <sup>-07</sup>       | 0.849                        |
| 19:45411941                            | rs429358           | APOE                | C/T                      | 0.076        | -0.248 (0.051)        | 1.53x10 <sup>-06</sup>       | 0.071        | -0.228 (0.047)        | 1.02x10 <sup>-06</sup>       | 0.774                        |
| <b>ESR (2531 males/3410 females)</b>   |                    |                     |                          |              |                       |                              |              |                       |                              |                              |
| 1:25724005                             | rs71721472         | RHCE                | T/C                      | 0.305        | -0.095 (0.032)        | 2.65x10 <sup>-03</sup>       | 0.291        | -0.161 (0.028)        | 1.45x10 <sup>-08</sup>       | 0.123                        |
| <b>1:207684359</b>                     | <b>rs11117956</b>  | <b>CR1</b>          | <b>T/G</b>               | <b>0.397</b> | <b>-0.102 (0.029)</b> | <b>3.65x10<sup>-04</sup></b> | <b>0.403</b> | <b>-0.215 (0.025)</b> | <b>8.51x10<sup>-18</sup></b> | <b>2.88x10<sup>-03</sup></b> |
| <b>11:5248004</b>                      | <b>rs76728603</b>  | <b>HBB</b>          | <b>A/G</b>               | <b>0.050</b> | <b>-0.348 (0.067)</b> | <b>2.52x10<sup>-07</sup></b> | <b>0.046</b> | <b>-0.589 (0.060)</b> | <b>1.31x10<sup>-22</sup></b> | <b>7.75x10<sup>-03</sup></b> |
| 12:125406340                           | -                  | AACS, MIR5188       | G/A                      | 0.008        | 1.260 (0.152)         | 2.00x10 <sup>-16</sup>       | 0.006        | 0.806 (0.164)         | 9.45x10 <sup>-07</sup>       | 0.044                        |
| <b>MCP-1 (2497 males/3347 females)</b> |                    |                     |                          |              |                       |                              |              |                       |                              |                              |
| 1:159175354                            | rs12075            | DARC                | G/A                      | 0.447        | -0.415 (0.029)        | 4.91x10 <sup>-46</sup>       | 0.445        | -0.408 (0.024)        | 3.15x10 <sup>-60</sup>       | 0.859                        |
| 1:159164454                            | rs2852718          | CADM3               | C/T                      | 0.021        | -0.223 (0.103)        | 0.03                         | 0.023        | -0.450 (0.084)        | 8.33x10 <sup>-08</sup>       | 0.087                        |
| 1:159175494                            | rs34599082         | DARC                | T/C                      | 0.037        | -0.068 (0.079)        | 0.39                         | 0.037        | -0.162 (0.066)        | 0.014                        | 0.359                        |
| 3:46383906                             | rs113403743        | CCR2                | T/G                      | 0.100        | 0.270 (0.050)         | 7.00x10 <sup>-08</sup>       | 0.098        | 0.273 (0.043)         | 3.65x10 <sup>-10</sup>       | 0.959                        |
| 3:46399764                             | rs200491743        | CCR2                | A/T                      | 0.005        | 1.115 (0.199)         | 2.50x10 <sup>-08</sup>       | 0.006        | 0.516 (0.170)         | 2.40x10 <sup>-03</sup>       | 0.022                        |
| <b>16:49072490</b>                     | <b>rs76135610</b>  | <b>N4BP1, CBLN1</b> | <b>T/C</b>               | <b>0.005</b> | <b>0.969 (0.172)</b>  | <b>1.76x10<sup>-08</sup></b> | <b>0.006</b> | <b>0.286 (0.192)</b>  | <b>0.1378</b>                | <b>8.06x10<sup>-03</sup></b> |
| <b>IL-6 (2492 males/3346 females)</b>  |                    |                     |                          |              |                       |                              |              |                       |                              |                              |
| 1:154428283                            | rs12133641         | IL6R                | G/A                      | 0.258        | 0.123 (0.030)         | 3.98x10 <sup>-05</sup>       | 0.253        | 0.117 (0.026)         | 9.58x10 <sup>-06</sup>       | 0.885                        |
| 9:136142355                            | rs643434           | ABO                 | A/G                      | 0.267        | -0.223 (0.030)        | 8.29x10 <sup>-14</sup>       | 0.260        | -0.218 (0.026)        | 2.18x10 <sup>-16</sup>       | 0.900                        |

## SUPPLEMENTARY TABLE 9. Replication results

The table describes replication results in the 8 European cohorts. For each cohort, we listed the number of individuals involved, the effect allele and the other allele, the frequency of the effect allele, the effect size and the standard error, the pvalue for association with hsCRP, and the imputation quality score INFO. We also provided the combined one-tail pvalues using a sample size weighted meta-analysis.

| Cohort                               | N    | Effect Allele / Other | Freq  | Effect (StdErr) | Pvalue | INFO |
|--------------------------------------|------|-----------------------|-------|-----------------|--------|------|
| <b>chr12:125533106 / rs183233091</b> |      |                       |       |                 |        |      |
| ING-FVG                              | 411  | A/G                   | 0.022 | 0.0490 (0.270)  | 0.854  | 0.60 |
| ING-VBI                              | 1162 | A/G                   | 0.023 | 0.2260 (0.165)  | 0.173  | 0.78 |
| HA                                   | 1093 | A/G                   | 0.019 | 0.2980 (0.204)  | 0.145  | 0.64 |
| HP                                   | 839  | A/G                   | 0.033 | 0.0219 (0.163)  | 0.892  | 0.74 |
| TwinsUK                              | 1167 | A/G                   | na    | na              | na     | na   |
| ALSPAC                               | 879  | A/G                   | na    | na              | na     | na   |
| INCIPE1                              | 807  | A/G                   | 0.018 | 0.1890 (0.205)  | 0.357  | 0.78 |
| INCIPE2                              | 1332 | A/G                   | 0.018 | -0.0356 (0.178) | 0.841  | 0.71 |

*Combined ING-FVG, ING-VBI, HA, HP (3505 individuals) one tail-pvalue 0.042*

*Combined all cohorts (5644 individuals) one tail-pvalue 0.053*

|                                    |      |     |       |                 |       |      |
|------------------------------------|------|-----|-------|-----------------|-------|------|
| <b>chr12:121139532 / rs1803508</b> |      |     |       |                 |       |      |
| ING-FVG                            | 411  | G/C | 0.003 | -1.140 (0.067)  | 0.918 | 0.97 |
| ING-VBI                            | 1162 | G/C | 0.012 | -0.4510 (0.211) | 0.034 | 0.86 |
| HA                                 | 1093 | G/C | 0.004 | -0.0078 (0.036) | 0.827 | 0.98 |
| HP                                 | 839  | G/C | 0.005 | 0.103 (0.037)   | 0.783 | 0.97 |
| TwinsUK                            | 1167 | G/C | 0.009 | -0.3126 (0.256) | 0.223 | na   |
| ALSPAC                             | 879  | G/C | 0.005 | -0.4127 (0.304) | 0.175 | na   |
| INCIPE1                            | 807  | G/C | 0.005 | 0.2154 (0.348)  | 0.536 | 0.97 |
| INCIPE2                            | 1332 | G/C | 0.004 | 0.2733 (0.303)  | 0.368 | 0.96 |

*Combined ING-FVG, ING-VBI, HA, HP (3505 individuals) one tail-pvalue 0.032 (but opposite direction compared to Sardinia)*

*Combined all cohorts (7689 individuals) one tail-pvalue 0.058*

|                                      |      |     |       |                |       |      |
|--------------------------------------|------|-----|-------|----------------|-------|------|
| <b>chr12:125650151 / rs148280335</b> |      |     |       |                |       |      |
| ING-FVG                              | 411  | C/T | 0.014 | 0.0161 (0.314) | 0.957 | 0.84 |
| ING-VBI                              | 1162 | C/T | 0.011 | 0.108 (0.218)  | 0.621 | 0.85 |

|         |      |     |       |                |       |      |
|---------|------|-----|-------|----------------|-------|------|
| HA      | 1093 | C/T | 0.015 | 0.199 (0.199)  | 0.318 | 0.84 |
| HP      | 839  | C/T | 0.018 | 0.131 (0.208)  | 0.539 | 0.83 |
| TwinsUK | 1167 | C/T | 0.010 | 0.1702 (0.239) | 0.477 | na   |
| ALSPAC  | 879  | C/T | 0.012 | 0.237 (0.192)  | 0.217 | na   |
| INCIPE1 | 807  | C/T | 0.011 | 0.3232 (0.251) | 0.198 | 0.85 |
| INCIPE2 | 1332 | C/T | 0.010 | 0.1972 (0.213) | 0.354 | 0.81 |

Combined ING-FVG, ING-VBI, HA, HP (3505 individuals) one tail-pvalue 0.062

Combined all cohorts (7689 individuals) one tail-pvalue 0.125

**chr12:125758826 / rs117135060**

|         |      |     |       |                 |       |      |
|---------|------|-----|-------|-----------------|-------|------|
| ING-FVG | 411  | A/G | 0.005 | 0.563(0.610)    | 0.357 | 0.60 |
| ING-VBI | 1162 | A/G | 0.011 | -0.204 (0.227)  | 0.368 | 0.79 |
| HA      | 1093 | A/G | 0.017 | -0.259 (0.172)  | 0.132 | 0.97 |
| HP      | 839  | A/G | 0.004 | 0.420 (0.414)   | 0.311 | 0.96 |
| TwinsUK | 1167 | A/G | 0.006 | -0.0816 (0.303) | 0.788 | na   |
| ALSPAC  | 879  | A/G | 0.010 | 0.237 (0.193)   | 0.219 | na   |
| INCIPE1 | 807  | A/G | 0.012 | -0.095 (0.222)  | 0.666 | 1.00 |
| INCIPE2 | 1332 | A/G | 0.012 | 0.1385 (0.220)  | 0.529 | 0.66 |

Combined ING-FVG, ING-VBI, HA, HP (3505 individuals) one tail-pvalue 0.115

Combined all cohorts (7689 individuals) one tail-pvalue 0.391

**chr12:125762779 / rs117818952**

|         |      |     |       |                 |       |      |
|---------|------|-----|-------|-----------------|-------|------|
| ING-FVG | 411  | T/C | 0.005 | -0.567 (0.609)  | 0.353 | 0.60 |
| ING-VBI | 1162 | T/C | 0.011 | -0.206 (0.227)  | 0.365 | 0.79 |
| HA      | 1093 | T/C | 0.017 | -0.259 (0.172)  | 0.132 | 0.97 |
| HP      | 839  | T/C | 0.004 | 0.421 (0.414)   | 0.310 | 0.97 |
| TwinsUK | 1167 | T/C | 0.006 | -0.0698 (0.303) | 0.819 | 1.00 |
| ALSPAC  | 879  | T/C | 0.010 | 0.2372 (0.193)  | 0.219 | 1.00 |
| INCIPE1 | 807  | T/C | 0.012 | -0.0984 (0.221) | 0.657 | 0.66 |
| INCIPE2 | 1332 | T/C | 0.012 | 0.1406 (0.220)  | 0.523 | 0.79 |

Combined ING-FVG, ING-VBI, HA, HP (3505 individuals) one tail-pvalue 0.115

Combined all cohorts (7689 individuals) one tail-pvalue 0.361

**chr12:125765572 / rs149451744**

|         |      |     |       |                |       |      |
|---------|------|-----|-------|----------------|-------|------|
| ING-FVG | 411  | G/C | 0.005 | -0.567 (0.610) | 0.354 | 0.58 |
| ING-VBI | 1162 | G/C | 0.011 | -0.206 (0.227) | 0.364 | 0.79 |
| HA      | 1093 | G/C | 0.017 | -0.259 (0.174) | 0.136 | 0.96 |

|         |      |     |       |                 |       |      |
|---------|------|-----|-------|-----------------|-------|------|
| HP      | 839  | G/C | 0.004 | 0.420 (0.414)   | 0.311 | 0.97 |
| TwinsUK | 1167 | G/C | 0.006 | -0.0693 (0.304) | 0.819 | 1.00 |
| ALSPAC  | 879  | G/C | 0.010 | 0.2458 (0.194)  | 0.206 | 0.99 |
| INCIPE1 | 807  | G/C | 0.012 | -0.0993 (0.221) | 0.654 | 0.66 |
| INCIPE2 | 1332 | G/C | 0.012 | 0.1398 (0.220)  | 0.526 | 0.79 |

Combined ING-FVG, ING-VBI, HA, HP (3505 individuals) one tail-pvalue 0.128

Combined all cohorts (7689 individuals) one tail-pvalue 0.365

**chr12:125766568 / rs142361132**

|         |      |     |       |                |       |      |
|---------|------|-----|-------|----------------|-------|------|
| ING-FVG | 411  | T/C | 0.005 | -0.546 (0.615) | 0.375 | 0.56 |
| ING-VBI | 1162 | T/C | 0.011 | -0.209 (0.228) | 0.360 | 0.79 |
| HA      | 1093 | T/C | 0.019 | -0.214 (0.170) | 0.210 | 0.91 |
| HP      | 839  | T/C | 0.004 | 0.419 (0.414)  | 0.313 | 0.98 |
| TwinsUK | 1167 | T/C | na    | na             | na    | na   |
| ALSPAC  | 879  | T/C | na    | na             | na    | na   |
| INCIPE1 | 807  | T/C | 0.012 | -0.105 (0.222) | 0.634 | 0.99 |
| INCIPE2 | 1332 | T/C | 0.012 | 0.176 (0.220)  | 0.422 | 0.65 |

Combined ING-FVG, ING-VBI, HA, HP (3505 individuals) one tail-pvalue 0.149

Combined all cohorts (5644 individuals) one tail-pvalue 0.272

**chr8:17450500 / rs73198138**

|         |      |     |       |                 |       |       |
|---------|------|-----|-------|-----------------|-------|-------|
| ING-FVG | 411  | A/G | 0.005 | 0.2620 (0.588)  | 0.656 | 0.665 |
| ING-VBI | 1162 | A/G | 0.018 | 0.1920 (0.175)  | 0.272 | 0.826 |
| HA      | 1093 | A/G | 0.009 | -0.0829 (0.247) | 0.737 | 0.694 |
| HP      | 839  | A/G | 0.023 | 0.0124 (0.177)  | 0.484 | 0.933 |
| TwinsUK | 879  | A/G | 0.028 | -0.1375 (0.149) | 0.357 | na    |
| ALSPAC  | 1167 | A/G | 0.023 | -0.0617 (0.141) | 0.663 | na    |
| INCIPE1 | 807  | A/G | 0.015 | -0.1720 (0.217) | 0.430 | 0.870 |
| INCIPE2 | 1332 | A/G | 0.016 | 0.1301 (0.178)  | 0.464 | 0.779 |

Combined ING-FVG, ING-VBI, HA, HP (3505 individuals) one tail-pvalue 0.173

Combined all cohorts (7689 individuals) one tail-pvalue 0.418

**SUPPLEMENTARY TABLE 10. Variants contributing to significant signals in the rare variant tests.**

The table show the chromosome and position (hg19) for variants that contribute to the significant rare variant association results at *STAB1* and *PTPRH* genes (see **Table 4**).

| <b><i>STAB1</i> variants<br/>(chr:position)</b> | <b><i>PTPRH</i> variants<br/>(chr:position)</b> |
|-------------------------------------------------|-------------------------------------------------|
| 3:52535766                                      | 19:55693469                                     |
| 3:52537010                                      | 19:55693470                                     |
| 3:52538507                                      | 19:55697255                                     |
| 3:52539378                                      | 19:55697712                                     |
| 3:52546403                                      | 19:55697718                                     |
| 3:52546872                                      | 19:55698955                                     |
| 3:52546910                                      | 19:55703094                                     |
| 3:52547252                                      | 19:55708649                                     |
| 3:52547915                                      | 19:55708761                                     |
| 3:52548194                                      | 19:55710068                                     |
| 3:52548465                                      | 19:55713439                                     |
| 3:52548787                                      | 19:55713661                                     |
| 3:52550173                                      | 19:55715342                                     |
| 3:52550722                                      | 19:55715359                                     |
| 3:52551566                                      | 19:55716713                                     |
| 3:52553377                                      |                                                 |
| 3:52553551                                      |                                                 |
| 3:52555958                                      |                                                 |
| 3:52556184                                      |                                                 |
| 3:52556385                                      |                                                 |
| 3:52557693                                      |                                                 |
| 3:52558237                                      |                                                 |



**SUPPLEMENTARY TABLE 11. Validation of imputed variants newly associated with inflammatory markers.**

For each SNP, we show the number of heterozygotes and homozygotes for the reference and alternative alleles that were imputed using the Sardinian panel, the number of these that were validated by Sanger sequencing along with the genotype mismatch rate, the pvalue observed in our primary analysis (as reported in **Table 3**) and the pvalue obtained replacing imputed genotypes with those derived by Sanger sequencing.

| SNP          | N<br>hom ref/het/hom alt | N Sanger sequencing     |                     |                         | Original<br>pvalue     | pvalue<br>after validation |
|--------------|--------------------------|-------------------------|---------------------|-------------------------|------------------------|----------------------------|
|              |                          | Hom Ref<br>(Mismatch %) | Het<br>(Mismatch %) | Hom alt<br>(Mismatch %) |                        |                            |
| 13:108884835 | 5824/12/0                | 12 (0%)                 | 12 (0%)             | 0                       | $3.35 \times 10^{-08}$ | $2.84 \times 10^{-08}$     |
| 8:17450500   | 5588/42/0                | 20 (0%)                 | 42 (7%)             | 0                       | $3.31 \times 10^{-09}$ | $2.65 \times 10^{-09}$     |
| 12:125533106 | 5524/105/1               | 20 (0%)                 | 63 (0%)             | 1 (100%)                | $1.09 \times 10^{-28}$ | $1.80 \times 10^{-28}$     |
| 12:125406340 | 5864/77/0                | 20 (0%)                 | 16 (0%)             | 0                       | $4.40 \times 10^{-23}$ | $4.41 \times 10^{-23}$     |
| 16:49072490  | 3312/35/0                | 21 (0%)                 | 33 (0%)             | 0                       | $1.76 \times 10^{-08}$ | $1.76 \times 10^{-08}$     |

**SUPPLEMENTARY TABLE 12. Association signals based on 1000G imputation for lipid levels**

The table reports top association signals identified with 1000G imputation for lipid levels. Columns are the same as defined in **Table 2**. The signal for the *Q40X* mutation was missed and misplaced 122Kb away to SNP rs76053862, located between *OR52E* and *OR52A5* genes.

| Candidate Gene              | Chr:position        | rs name           | Effect Allele / Other | Freq         | Effect (StdErr)      | pvalue                                   | R2         | RSQR             | Variant Consequence    |
|-----------------------------|---------------------|-------------------|-----------------------|--------------|----------------------|------------------------------------------|------------|------------------|------------------------|
| <b>LDL</b>                  |                     |                   |                       |              |                      |                                          |            |                  |                        |
| <i>PCSK9</i>                | 1:55505647          | rs11591147        | T/G                   | 0.038        | -0.406(0.053)        | $1.51 \times 10^{-14}$                   | 1.0        | Genotyped        | Missense, R46L         |
| <i>SORT1</i>                | 1:109821307         | rs583104          | G/T                   | 0.180        | -0.156(0.027)        | $2.06 \times 10^{-08}$                   | 0.5        | Genotyped        | Downstream             |
| <b><i>OR52E, OR52A5</i></b> | <b>11:5125982</b>   | <b>rs76053862</b> | <b>T/C</b>            | <b>0.049</b> | <b>-0.403(0.054)</b> | <b><math>1.44 \times 10^{-13}</math></b> | <b>0.9</b> | <b>0.785</b>     | <b>Intergenic</b>      |
| <i>CILP2</i>                | 19:19456917         | rs58489806        | T/C                   | 0.074        | -0.233(0.042)        | $2.59 \times 10^{-08}$                   | 0.5        | Genotyped        | Intronic               |
| <i>APOE</i>                 | 19:45412079         | rs7412            | T/C                   | 0.037        | -0.645(0.053)        | $2.47 \times 10^{-33}$                   | 2.4        | Genotyped        | Missense, R176C        |
| <i>APOE</i>                 | 19:45411941         | rs429358*         | C/T                   | 0.074        | 0.264(0.039)         | $1.21 \times 10^{-11}$                   | 0.8        | 0.999            | Missense, C130R        |
| <b>TC</b>                   |                     |                   |                       |              |                      |                                          |            |                  |                        |
| <i>PCSK9</i>                | 1:55505647          | rs11591147        | T/G                   | 0.038        | -0.38(0.053)         | $9.79 \times 10^{-14}$                   | 1.0        | Genotyped        | Missense, R46L         |
| <b><i>OR52E, OR52A5</i></b> | <b>11:5125982</b>   | <b>rs76053862</b> | <b>T/C</b>            | <b>0.048</b> | <b>-0.407(0.054)</b> | <b><math>5.95 \times 10^{-14}</math></b> | <b>1.0</b> | <b>0.785</b>     | <b>Intergenic</b>      |
| <i>CILP2</i>                | 19:19456917         | rs58489806        | T/C                   | 0.074        | -0.264(0.041)        | $2.15 \times 10^{-10}$                   | 0.6        | Genotyped        | Intronic               |
| <i>APOE</i>                 | 19:45412079         | rs7412            | T/C                   | 0.036        | -0.544(0.053)        | $2.06 \times 10^{-24}$                   | 1.7        | Genotyped        | Missense, R176C        |
| <i>APOE</i>                 | 19:45411941         | rs429358*         | C/T                   | 0.074        | -0.215(0.038)        | $3.09 \times 10^{-08}$                   | 0.5        | 0.999            | Missense, C130R        |
| <b>HDL</b>                  |                     |                   |                       |              |                      |                                          |            |                  |                        |
| <i>LPL</i>                  | 8:19815256          | rs286**           | T/A                   | 0.125        | 0.257(0.046)         | $2.70 \times 10^{-08}$                   | 1.2        | Genotyped        | Intronic               |
| <i>LIPC</i>                 | 15:58687603         | rs174418          | T/C                   | 0.467        | 0.137(0.021)         | $1.19 \times 10^{-10}$                   | 0.7        | 0.996            | Intergenic             |
| <i>CETP</i>                 | 16:56987015         | rs12446515        | C/T                   | 0.268        | 0.190(0.023)         | $1.96 \times 10^{-16}$                   | 1.1        | Genotyped        | Intergenic             |
| <b>TG</b>                   |                     |                   |                       |              |                      |                                          |            |                  |                        |
| <i>LPL</i>                  | 8:19938902          | -                 | CAAAT/C               | 0.2078       | -0.169(0.027)        | $3.14 \times 10^{-10}$                   | 0.7        | 0.87             | Intergenic             |
| <b><i>APOA5</i></b>         | <b>11:116661101</b> | -                 | <b>T/G</b>            | <b>0.025</b> | <b>-0.450(0.064)</b> | <b><math>1.24 \times 10^{-12}</math></b> | <b>0.9</b> | <b>Genotyped</b> | <b>Missense, R282S</b> |

|              |              |               |     |       |               |                        |     |           |          |
|--------------|--------------|---------------|-----|-------|---------------|------------------------|-----|-----------|----------|
| <i>APOA5</i> | 11:116664040 | rs10750097*** | G/A | 0.171 | 0.174(0.027)  | $1.13 \times 10^{-10}$ | 0.7 | Genotyped | Upstream |
| <i>CILP2</i> | 19:19456917  | rs58489806    | T/C | 0.074 | -0.260(0.039) | $2.14 \times 10^{-11}$ | 0.8 | Genotyped | Intronic |

**Notes:**

\* Association parameters reported for this marker refer to a model that includes rs7412 as additional covariate

\*\* Results refer to the sex-specific analyses. See **Supplementary Table 7** for more details.

\*\*\* Association parameters reported for this marker refer to a model that includes 11:116661101 as additional covariate

**SUPPLEMENTARY TABLE 13. Association signals based on 1000G imputation for the inflammatory markers**

The table reports top association signals identified with 1000G imputation for inflammatory markers. Columns are the same as defined in **Table 3**. Signals at novel loci are in bold. Independent signals, indicated in italics, are reported along with the regression coefficients from the conditional analysis. More specifically, *PDGFRL*, *ABHD13* and *N4BP1/CBLN1* loci are not listed as none of the tested SNPs showed a pvalue < 5x10<sup>-8</sup>, whereas at the *AACS* locus association was observed with weaker evidence in the neighbouring region (near *SCARB1* gene). Variants in *PDGFRL*, *AACS* (rs183233091) and *N4BP1/CBLN1* are present in 1000G panels but are poorly imputed in our population. In further comparisons with the recent release of the UK10K project, marker chr13:108884835 at *ABHD13* is now reported, but with extremely low frequency (MAF=1/7562), whereas the variant chr12:125406340 near *AACS* remains absent outside Sardinia, and is thus either specific to Sardinians or extremely rare elsewhere in Europe. Finally, the association at the *HBB* locus was detected, but with a much weaker signal at a gene nearby.

| SNP                 | rs name             | Nearest Gene         | Effect allele /<br>Other | Freq         | pvalue                       | Effect (StdErr)       | RSQR         | Type                 |
|---------------------|---------------------|----------------------|--------------------------|--------------|------------------------------|-----------------------|--------------|----------------------|
| <b>ADPN</b>         |                     |                      |                          |              |                              |                       |              |                      |
| 3:186559460         | rs17300539          | <i>ADIPOQ</i>        | A/G                      | 0.156        | 4.86x10 <sup>-22</sup>       | 0.246 (0.025)         | 1.000        | intergenic           |
| <b>hsCRP</b>        |                     |                      |                          |              |                              |                       |              |                      |
| 1:159684665         | rs3091244           | <i>CRP</i>           | A/G                      | 0.428        | 5.28x10 <sup>-27</sup>       | 0.207 (0.019)         | Genotyped    | intergenic           |
| 12:121428455        | rs1169297           | <i>HNF1A</i>         | A/G                      | 0.344        | 3.25x10 <sup>-08</sup>       | -0.116 (0.021)        | 0.935        | Intronic             |
| <b>12:125259484</b> | <b>ss1372755559</b> | <b><i>SCARB1</i></b> | <b>AATTC/A</b>           | <b>0.995</b> | <b>9.66x10<sup>-21</sup></b> | <b>-1.472 (0.157)</b> | <b>0.672</b> | <b>intergenic</b>    |
| 19:45411941         | rs429358            | <i>APOE</i>          | C/T                      | 0.074        | 1.38x10 <sup>-11</sup>       | -0.240 (0.035)        | 0.988        | nonsyn               |
| <b>ESR</b>          |                     |                      |                          |              |                              |                       |              |                      |
| 1:207688373         | rs4433395           | <i>CR1</i>           | C/T                      | 0.603        | 1.15x10 <sup>-17</sup>       | 0.156 (0.018)         | 0.984        | intronic             |
| 11:5125982          | rs76053862          | <i>OR52A5</i>        | C/T                      | 0.049        | 3.59x10 <sup>-14</sup>       | -0.343 (0.045)        | 0.785        | Intergenic           |
| <b>12:125259484</b> | <b>ss1372755559</b> | <b><i>SCARB1</i></b> | <b>AATTC/A</b>           | <b>0.995</b> | <b>6.30x10<sup>-18</sup></b> | <b>-1.269 (0.157)</b> | <b>0.672</b> | <b>intergenic</b>    |
| <b>MCP-1</b>        |                     |                      |                          |              |                              |                       |              |                      |
| 1:159175354         | rs12075             | <i>DARC</i>          | A/G                      | 0.554        | 2.79x10 <sup>-95</sup>       | 0.405 (0.019)         | 1.000        | nonsyn               |
| 1:159162174         | rs2814767           | <i>CADM3</i>         | T/G                      | 0.022        | 1.049x10 <sup>-16</sup>      | -0.520 (0.062)        | 0.985        | intronic             |
| <b>1:159175494</b>  | <b>rs34599082</b>   | <b><i>DARC</i></b>   | <b>C/T</b>               | <b>0.037</b> | <b>1.02x10<sup>-11</sup></b> | <b>-0.339 (0.050)</b> | <b>0.999</b> | <b><u>nonsyn</u></b> |
| 3:46391788          | rs17141006          | <i>CCR2</i>          | G/T                      | 0.099        | 3.64x10 <sup>-15</sup>       | 0.271 (0.034)         | 1.000        | intergenic           |
| <b>IL6</b>          |                     |                      |                          |              |                              |                       |              |                      |
| 1:154428283         | rs12133641          | <i>IL6R</i>          | G/A                      | 0.256        | 7.23x10 <sup>-09</sup>       | 0.119 (0.021)         | 0.999        | intronic             |
| 9:136132908         | N/A                 | <i>ABO</i>           | T/TC                     | 0.742        | 1.66x10 <sup>-26</sup>       | -0.222 (0.021)        | 0.997        | -                    |

## SUPPLEMENTARY TABLE 14. CADD score at loci associated with lipid levels

The table shows the CADD score for each lead SNP reported in **Table 2**, and indicates the SNP with the highest CADD among those in  $r^2 > 0.5$  with the lead.

| Candidate gene                  | Lead SNP     | CADD score | SNP with highest CADD score | CADD score | $r^2$ with lead |
|---------------------------------|--------------|------------|-----------------------------|------------|-----------------|
| <b>LDL</b>                      |              |            |                             |            |                 |
| <i>PCSK9</i>                    | 1:55505647   | 11.46      | -                           | -          | -               |
| <i>SORT1</i>                    | 1:109821307  | 8.78       | 1:109821511                 | 13.1       | 0.80            |
| <i>HBB</i>                      | 11:5248004   | 37         | -                           | -          | -               |
| <i>CILP2</i>                    | 19: 19456917 | 2.59       | 19:19379549                 | 17.03      | 0.85            |
| <i>APOE</i>                     | 19:45412079  | 15.82      | -                           | -          | -               |
| <i>APOE</i>                     | 19:45411941  | 0.007      | 19:45410002                 | 9.031      | 0.55            |
| <b>TC</b>                       |              |            |                             |            |                 |
| <i>PCSK9</i>                    | 1:55505647   | 11.46      | -                           | -          | -               |
| <i>TMEM33, DCAF4L1, SLC30A9</i> | 4:41980435   | 4.075      | -                           | -          | -               |
| <i>HBB</i>                      | 11:5248004   | 37         | -                           | -          | -               |
| <i>CILP2</i>                    | 19:19456917  | 2.59       | 19:19379549                 | 17.03      | 0.85            |
| <i>APOE</i>                     | 19:45412079  | 15.82      | -                           | -          | -               |
| <i>APOE</i>                     | 19:45411941  | 0.007      | 19:45410002                 | 9.031      | 0.55            |
| <b>HDL</b>                      |              |            |                             |            |                 |
| <i>LPL</i>                      | 8:19845376   | 1.991      | 8:19819724                  | 42         | 0.63            |
| <i>LIPC</i>                     | 15:58687603  | 3.275      | 15:58678512                 | 9.379      | 0.55            |
| <i>CETP</i>                     | 16: 56989590 | 0.229      | 16:56990716                 | 7.471      | 0.99            |
| <i>TGIF1</i>                    | 18:3412386   | 1.244      | -                           | -          | -               |
| <b>TG</b>                       |              |            |                             |            |                 |
| <i>LPL</i>                      | 8:19845376   | 8.273      | 8:19819724                  | 42         | 0.63            |
| <i>APOA5</i>                    | 11:116661101 | 10.41      | -                           | -          | -               |
| <i>APOA5</i>                    | 11:116664040 | 3.350      | 11:116589652                | 10.27      | 0.50            |
| <i>CILP2</i>                    | 19:19456917  | 2.59       | 19:19379549                 | 17.03      | 0.85            |

## SUPPLEMENTARY TABLE 15. CADD score at loci associated with inflammatory markers

The table shows the CADD score for each lead SNP reported in **Table 3**, and indicates the SNP with the highest CADD among those in  $r^2 > 0.5$  with the lead.

| Candidate gene       | Lead SNP     | CADD score | SNP with highest CADD score | CADD score | $r^2$ with lead |
|----------------------|--------------|------------|-----------------------------|------------|-----------------|
| <b>ADPN</b>          |              |            |                             |            |                 |
| <i>ADIPOQ</i>        | 3:186559460  | 2.871      | 3:186556037                 | 9.058      | 0.95            |
| <i>ABDH13</i>        | 13:108884835 | 6.903      | -                           | -          | -               |
| <b>hsCRP</b>         |              |            |                             |            |                 |
| <i>CRP</i>           | 1:159684665  | 0.217      | 1:159713225                 | 14.18      | 0.89            |
| <i>PDGFRL</i>        | 8:17450500   | 0.306      | -                           | -          | -               |
| <i>BRI3BP, AACS</i>  | 12:125533106 | 0.164      | -                           | -          | -               |
| <i>HNF1A</i>         | 12:121415293 | 0.172      | 12:121438844                | 10.22      | 0.70            |
| <i>APOE</i>          | 19:45411941  | 0.007      | 19:45410002                 | 9.031      | 0.55            |
| <b>ESR</b>           |              |            |                             |            |                 |
| <i>RHCE, TMEM57</i>  | 1:25724005   | 8.273      | 1:25561667                  | 16.1       | 0.51            |
| <i>CR1</i>           | 1:207684359  | 0.409      | 1:207789471                 | 22.1       | 0.97            |
| <i>HBB</i>           | 11:5248004   | 37         | -                           | -          | -               |
| <i>AACS, MIR5188</i> | 12:125406340 | 10.42      | -                           | -          | -               |
| <b>MCP-1</b>         |              |            |                             |            |                 |
| <i>DARC</i>          | 1:159175354  | 0.168      | -                           | -          | -               |
| <i>CADM3</i>         | 1:159164454  | 4.825      | 1:159090256                 | 25.5       | 0.55            |
| <i>DARC</i>          | 1:159175494  | 12.96      | -                           | -          | -               |
| <i>CCR2, CCR3</i>    | 3:46383906   | 3.318      | 3:46412559                  | 14.03      | 0.86            |
| <i>CCR2</i>          | 3:46399764   | 15.88      | -                           | -          | -               |
| <i>N4BP1, CBLN1</i>  | 16:49072490  | 0.903      | 16:49145757                 | 6.255      | 0.56            |
| <b>IL-6</b>          |              |            |                             |            |                 |
| <i>IL6R</i>          | 1:154428283  | 3.658      | 1:154414296                 | 12.99      | 0.90            |
| <i>ABO</i>           | 9:136142355  | 0.215      | 9:136149229                 | 3.651      | 0.84            |

### SUPPLEMENTARY TABLE 16. Variance explained by top hits for lipid levels

For each of the four lipid traits, the table shows the amount of phenotypic variance explained by the top signals identified in this work using the Sardinian (**Table 2**) and the 1000 Genomes reference panel. We calculated the log likelihood of each model and report the difference.

| Trait | Heritability<br>in our<br>study | Variance explained by<br>top hits identified with: |       | differences in<br>Loglikelihood |
|-------|---------------------------------|----------------------------------------------------|-------|---------------------------------|
|       |                                 | Sardinian                                          | 1000G |                                 |
| LDL-c | 42.5                            | 7.77                                               | 6.95  | 32.91                           |
| TC    | 42.7                            | 4.57                                               | 4.21  | 14.22                           |
| HDL   | 49.2                            | 1.92                                               | 1.92  | -0.04                           |
| TG    | 32.4                            | 2.15                                               | 2.10  | 1.42                            |

**SUPPLEMENTARY TABLE 17. Variance explained by top hits for the inflammatory markers**

For each of the five inflammatory markers, the table shows the amount of phenotypic variance explained by the top signals identified in this work using the Sardinian and the 1000 Genomes reference panel, as well as the variance explained by loci detected in our previous report (Naitza S. et al, Plos Genetics 2012) based on HapMap2 variants (with calculations repeated using the same sample size and genotypes described in this manuscript). In addition, we calculated the log likelihood of each model and report the difference.

| Trait | Heritability<br>in our study | Variance explained by top hits<br>identified with: |       |         | differences in<br>Loglikelihood: |                        |
|-------|------------------------------|----------------------------------------------------|-------|---------|----------------------------------|------------------------|
|       |                              | Sardinian                                          | 1000G | HapMap2 | Sardinian -<br>1000G             | Sardinian -<br>HapMap2 |
| ADPN  | 39.2                         | 2.37                                               | 1.93  | na      | 16.08                            | na                     |
| hsCRP | 25.1                         | 6.35                                               | 5.27  | 5.49    | 57.77                            | 48.69                  |
| ESR   | 43.1                         | 4.58                                               | 2.98  | 2.6     | 72.49                            | 86.03                  |
| MCP-1 | 31                           | 11.8                                               | 11.23 | 9.36    | 20.27                            | 85.14                  |
| IL-6  | 15.3                         | 2.49                                               | 2.54  | 2.49    | -1.68                            | 0.10                   |



## SUPPLEMENTARY FIGURES

### SUPPLEMENTARY FIGURE 1. Average deleteriousness of variants

Average deleteriousness of variants shared between 1000 Genomes and Sardinia (in red) or unique to Sardinia (in blue). Deleteriousness is summarized in a CADD score, where higher scores suggest larger deleterious effects. Panel A shows results for variants that alter protein coding sequences; Panel B shows results for remaining variants. The difference between the curves was significant only for coding variants (ANOVA test, pvalues =0.02 and 0.41 for coding and noncoding variants).

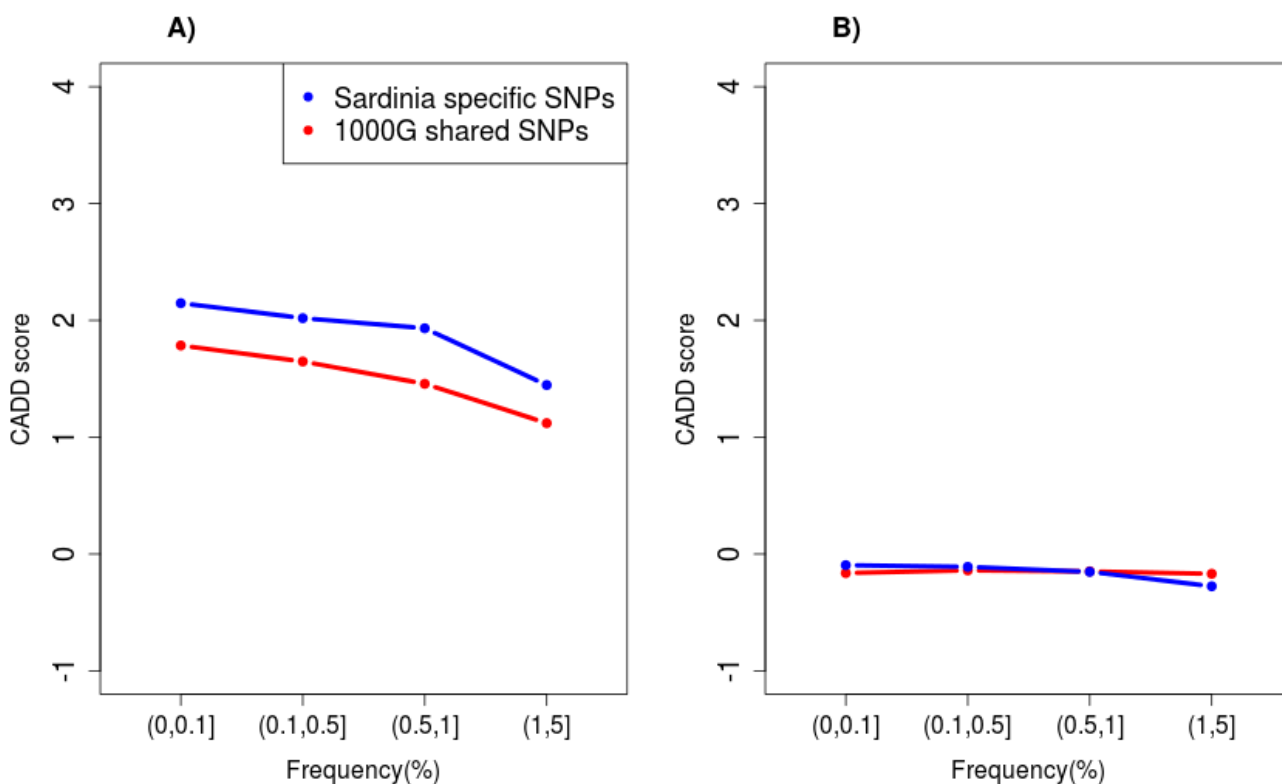

## SUPPLEMENTARY FIGURE 2. F<sub>ST</sub> differentiation between Sardinians and other Europeans

Differentiation between Sardinians and other European populations, summarized in a color-coded matrix of F<sub>ST</sub> values. All tabulated F<sub>ST</sub> values have been multiplied by 1,000. European populations are drawn from a previously curated set of 1,385 European individuals in the POPRES study (dbGAP accession number 2039). For all comparisons, the F<sub>ST</sub> values are significant with P < 0.001 (none of the 1000 random permutations that we generated had p-values higher), with the exceptions of the following pairs: Belgium - Germany (p=0.005); Belgium - Netherlands (p=0.67); Germany - Netherlands (p=0.145); and Netherlands - United Kingdom (p=0.315).

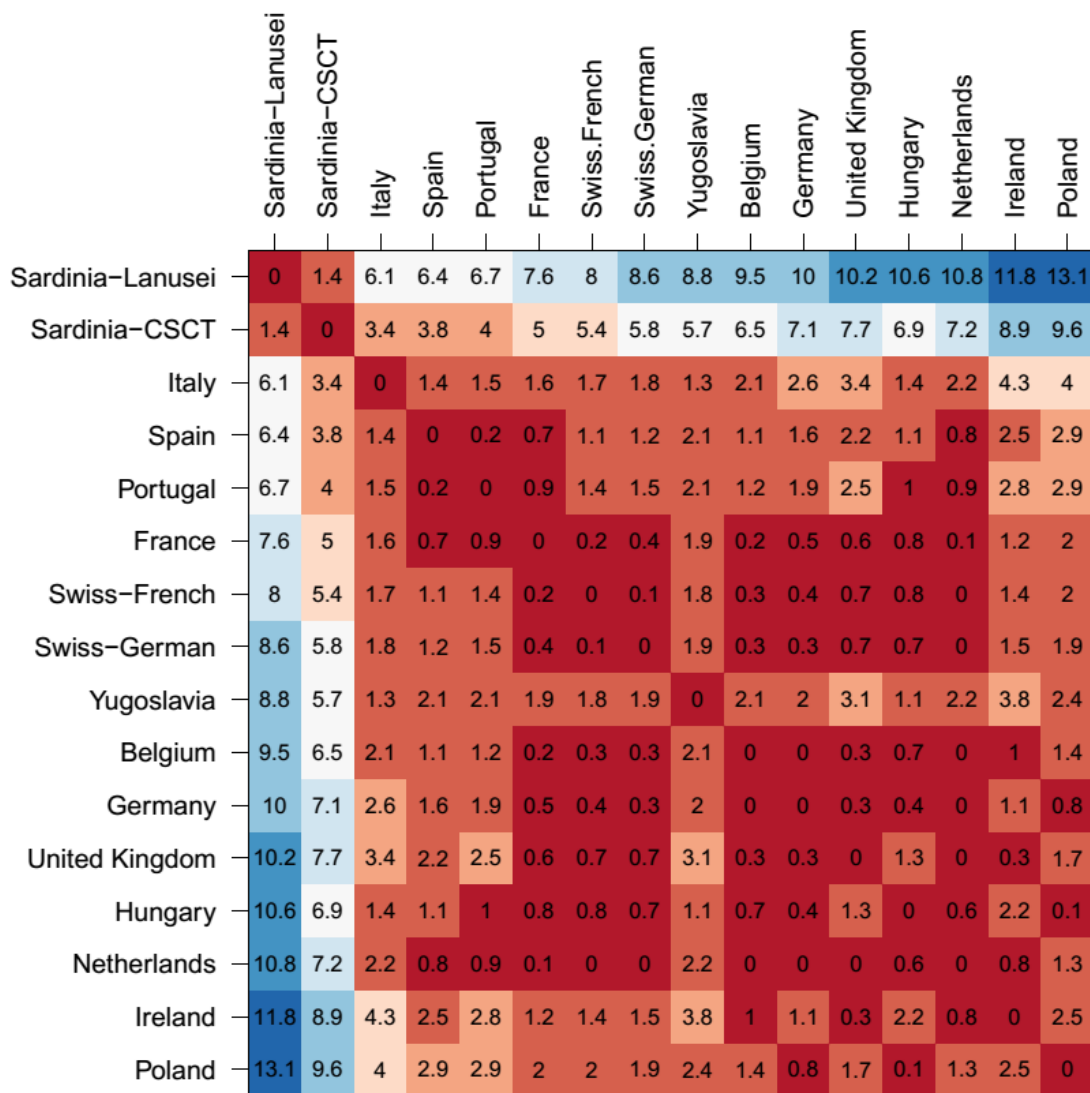

### SUPPLEMENTARY FIGURE 3. Principal component ancestry map

Panel A shows a principal component ancestry map of Europe, including both our samples and a previously described set of diverse European individuals. In this analysis, the map was constructed using all available European POPRES samples, and all sequenced Sardinian samples were projected into an existing PCA coordinate space, one a time (see **Methods**). Sardinian samples from the Lanusei valley (SDL) and from case-control studies (SDC) are plotted in grey and black, respectively. Panel B graphically show a standard PCA analysis with Sardinians and individuals from the 1000 Genomes Phase 1.

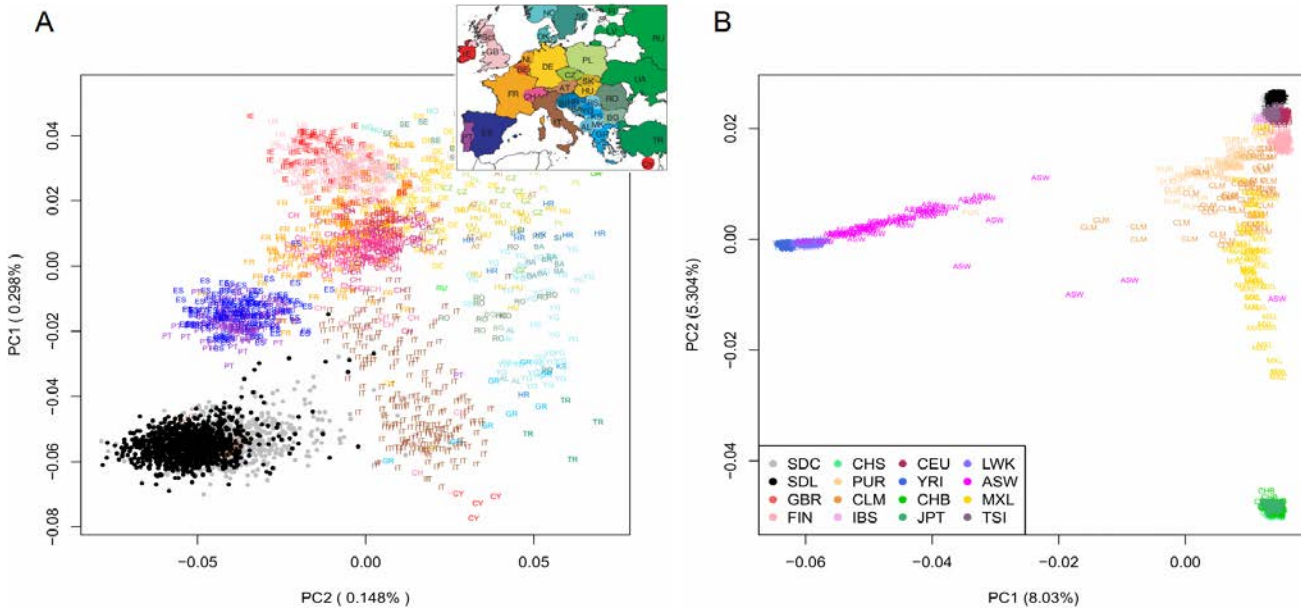

## SUPPLEMENTARY FIGURE 4. Imputation accuracy comparisons

Performance of imputation based analyses using 1000 Genomes Phase 1 (black line), 1000 Genomes Phase 3 (red line) or our Sardinian sequences (blue line) as a reference panel. The quality is reported as a function of allele frequency; the number of variants used for estimating accuracy is reported below each frequency label.

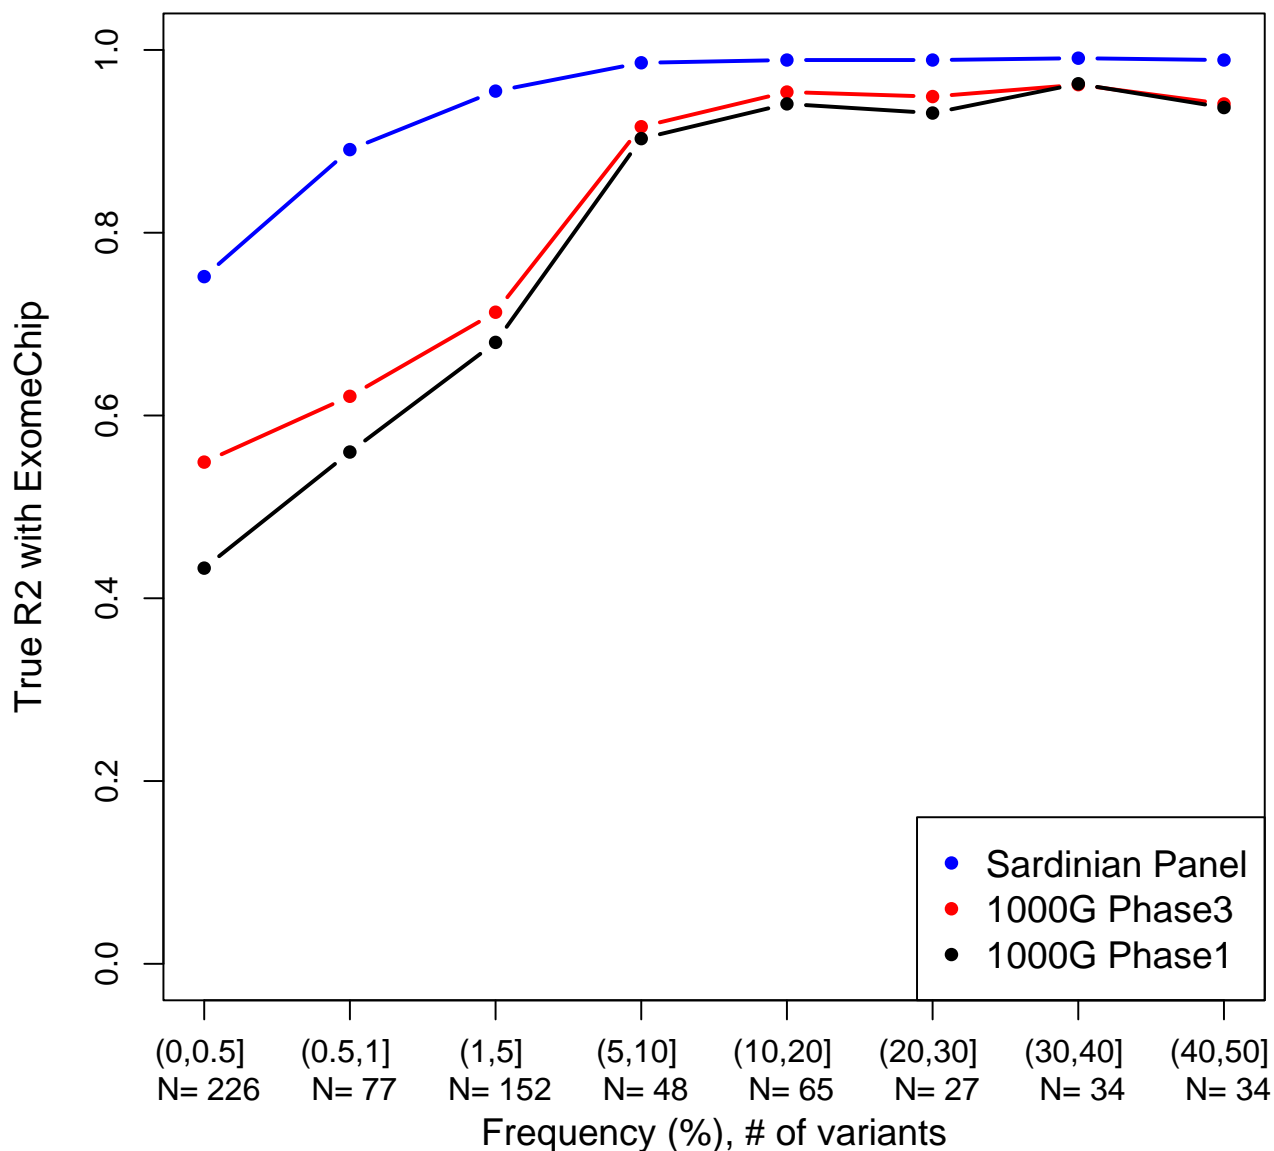

## SUPPLEMENTARY FIGURE 5. Proportion of haplotypes with nearest neighbour in the Lanusei valley, as a function of grandparental birthplace

Panels show first all individuals in the SardiNIA study and, subsequently, stratify these individuals according to the number of haplotypes (0-4) known to originate in the valley. Note that the fraction of haplotypes where nearest neighbour originates in the valley closely tracks grandparental ancestry.

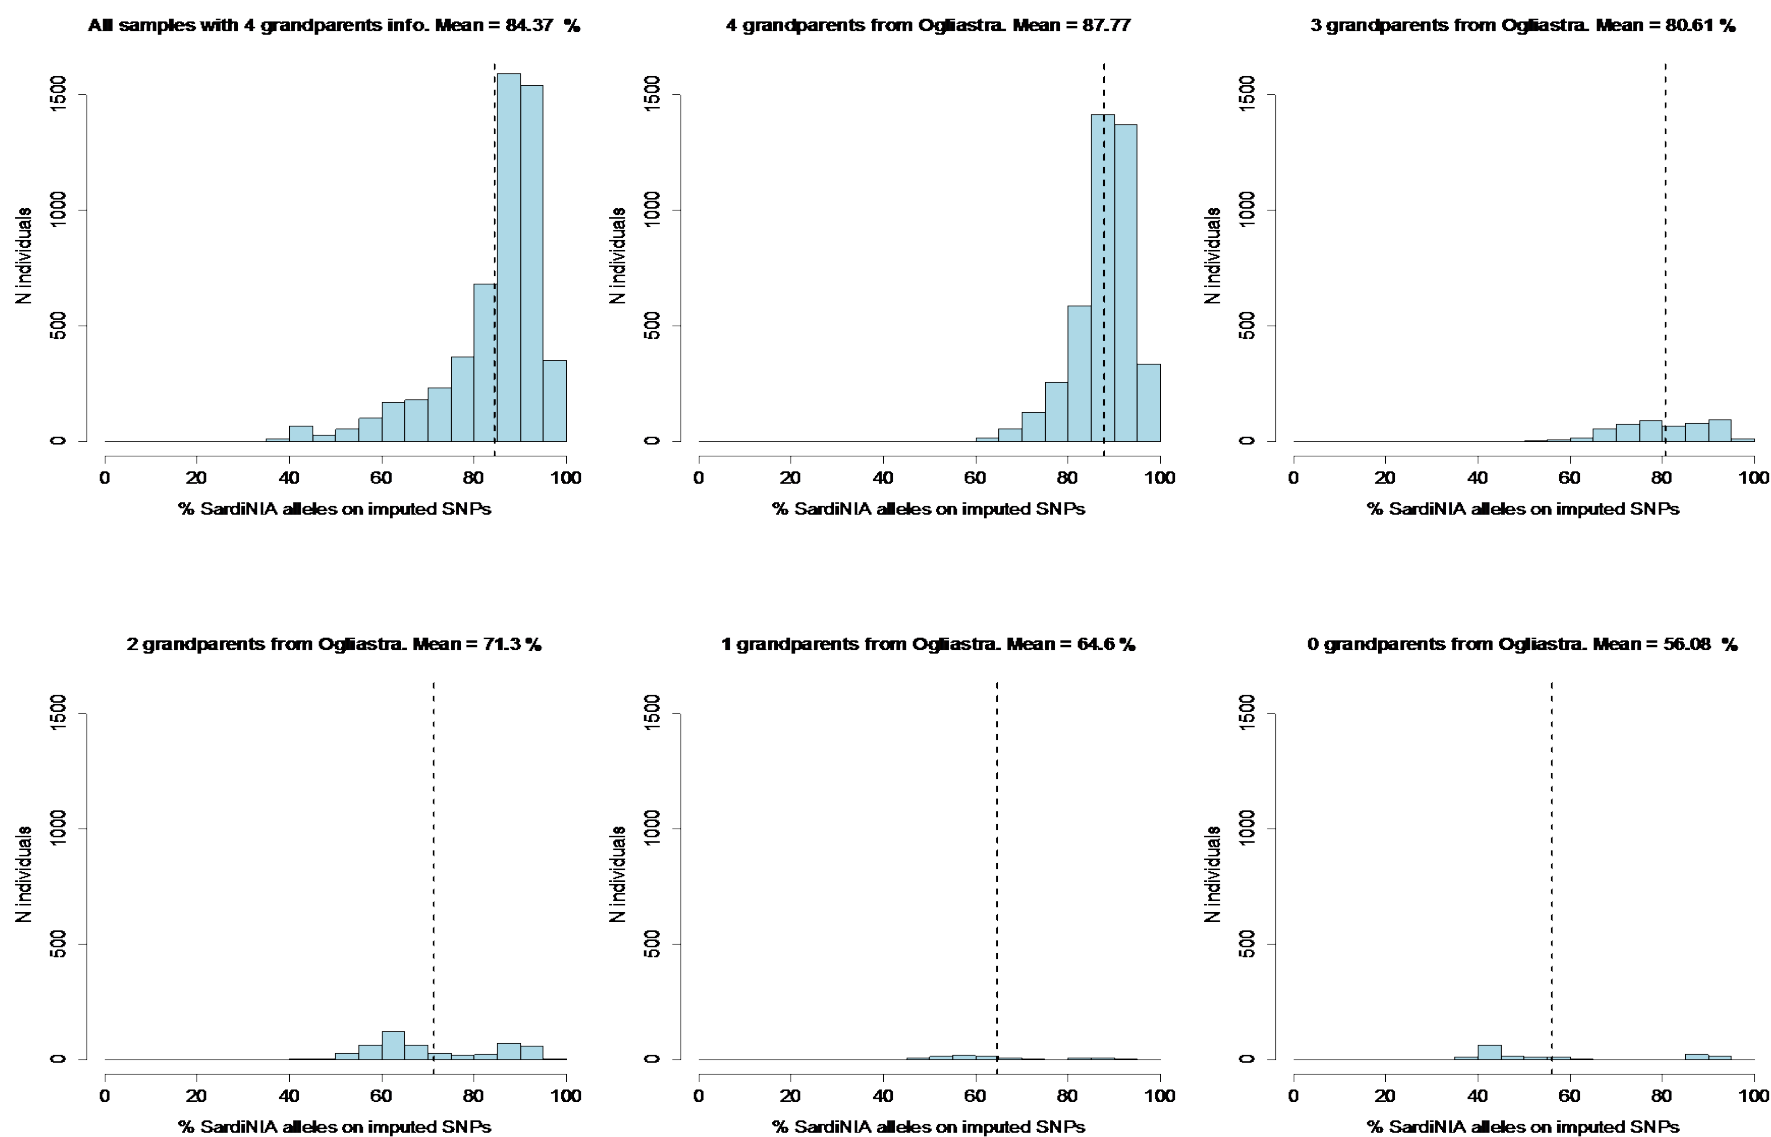

## SUPPLEMENTARY FIGURE 6. Manhattan plots for studied traits

The figures show association results for the studied traits for all QCed genotyped and imputed markers at autosomes, and only genotyped markers on the X chromosome. For each trait, results refer to those obtained from imputation using the Sardinian (upper inset) and 1000G phase 3 (lower inset) sequencing data. For signals that reach the  $6.9 \times 10^{-9}$  threshold the corresponding candidate gene is annotated.

A)

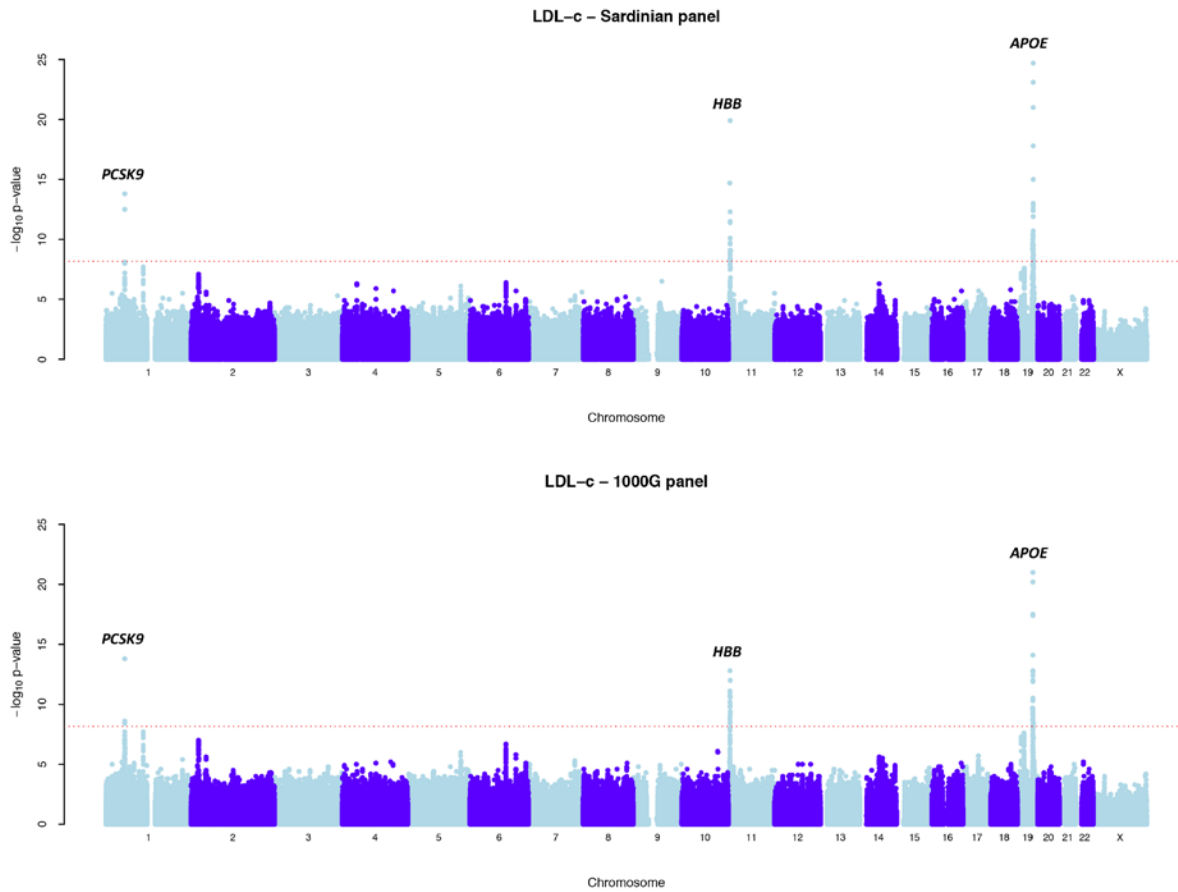

B)

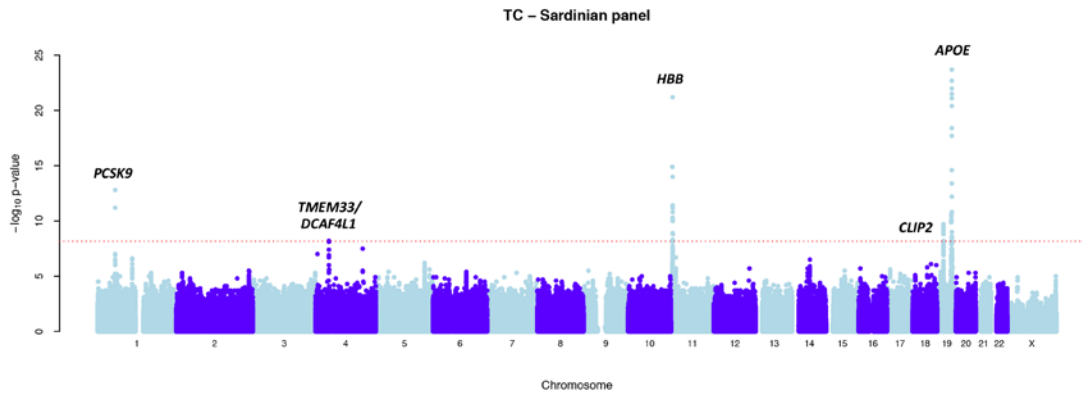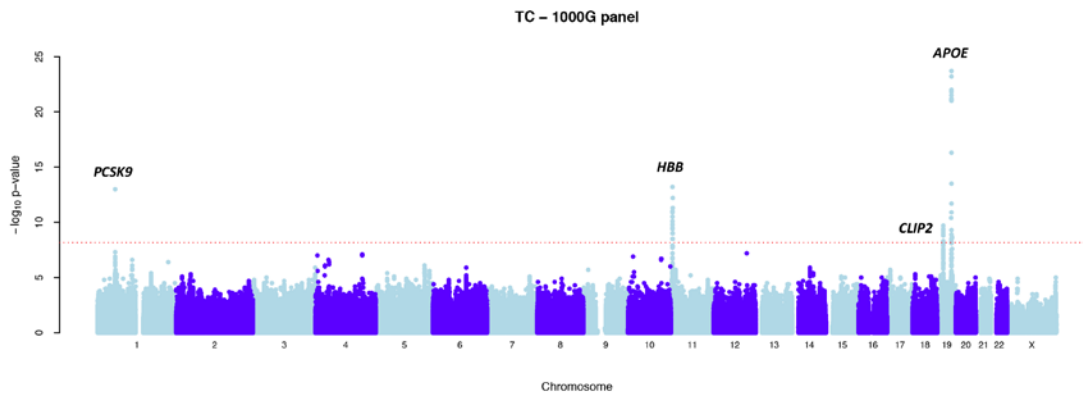

C)

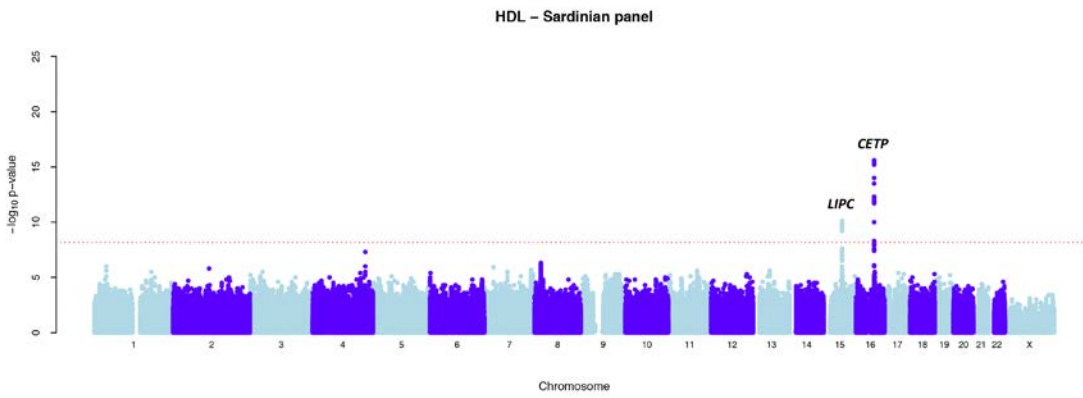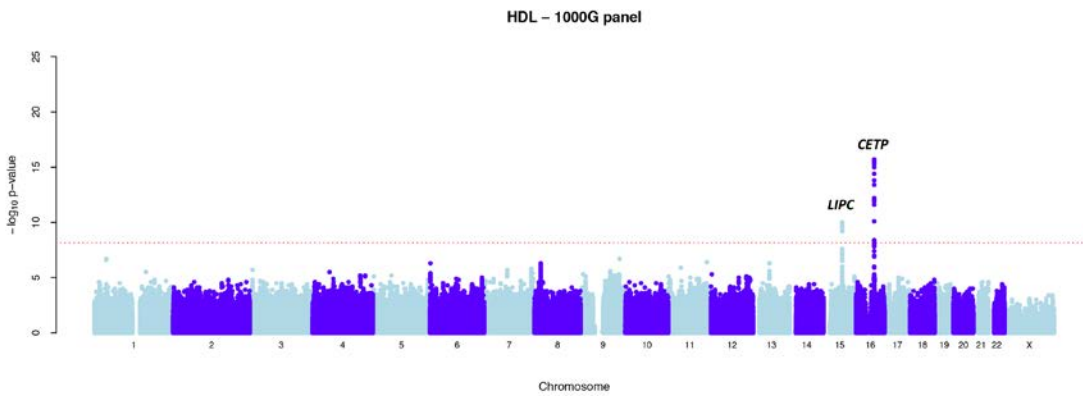

D)

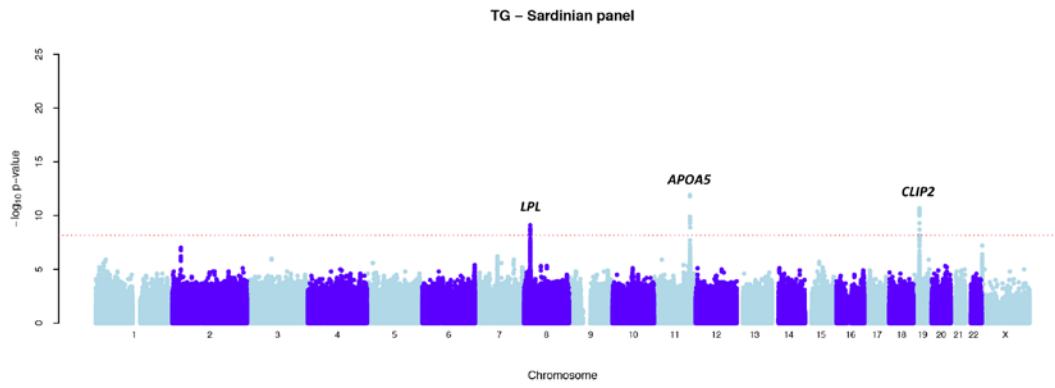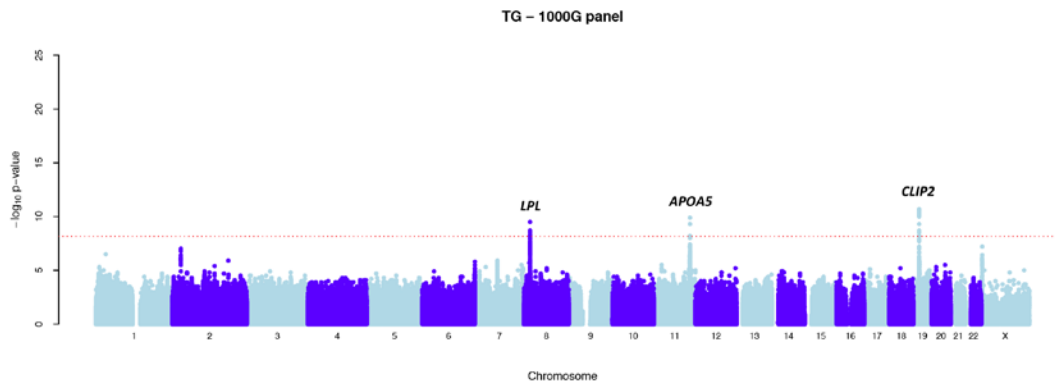

E)

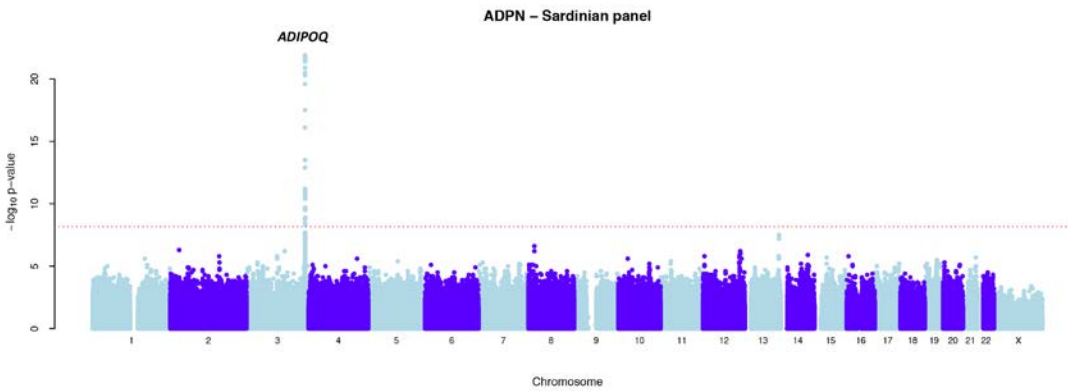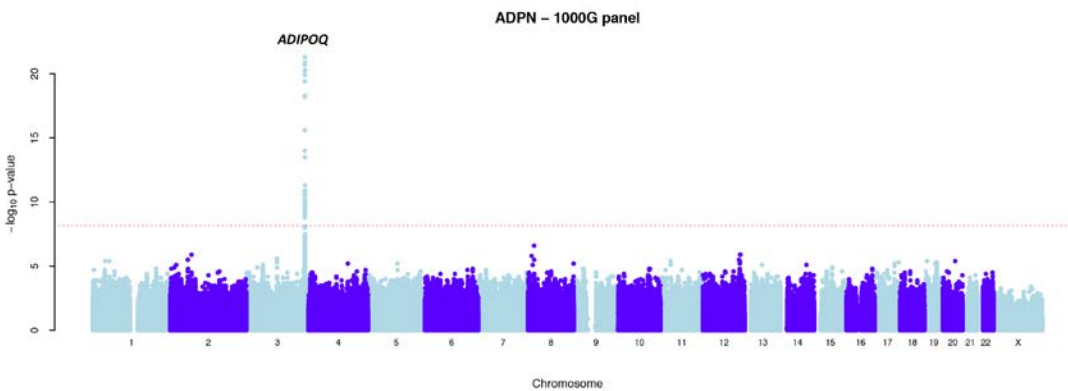



F)

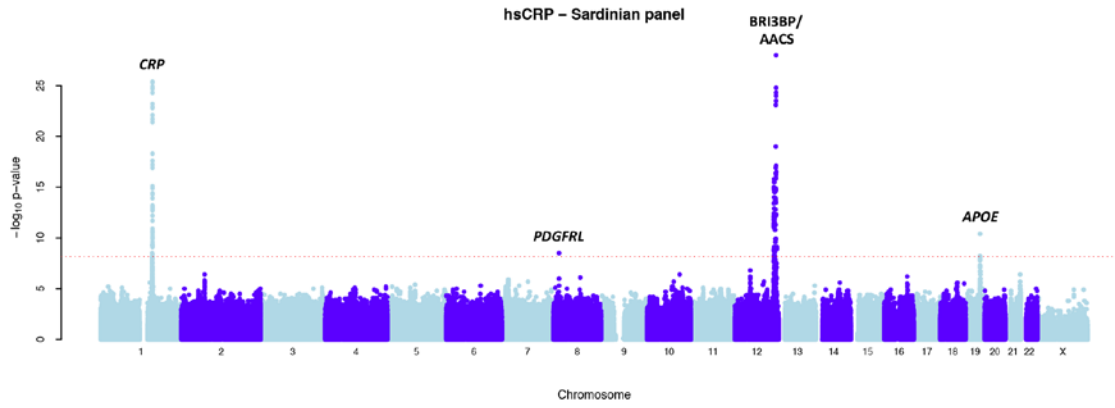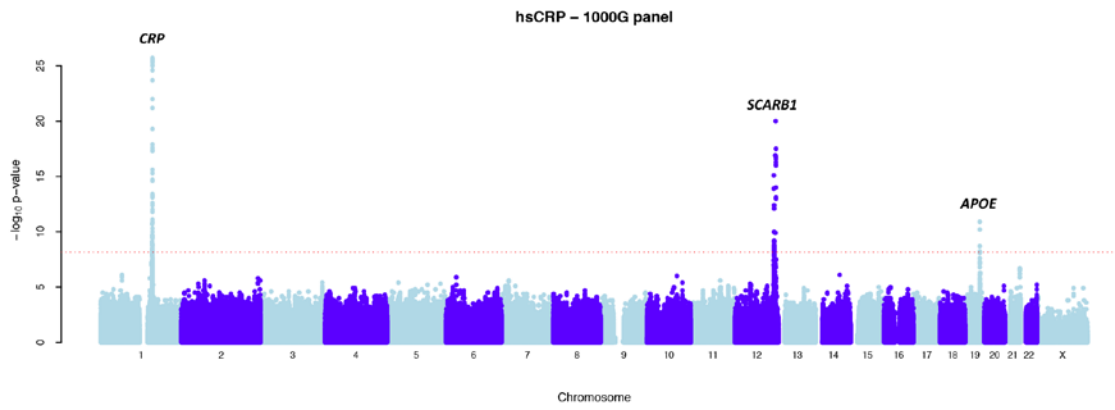

G)

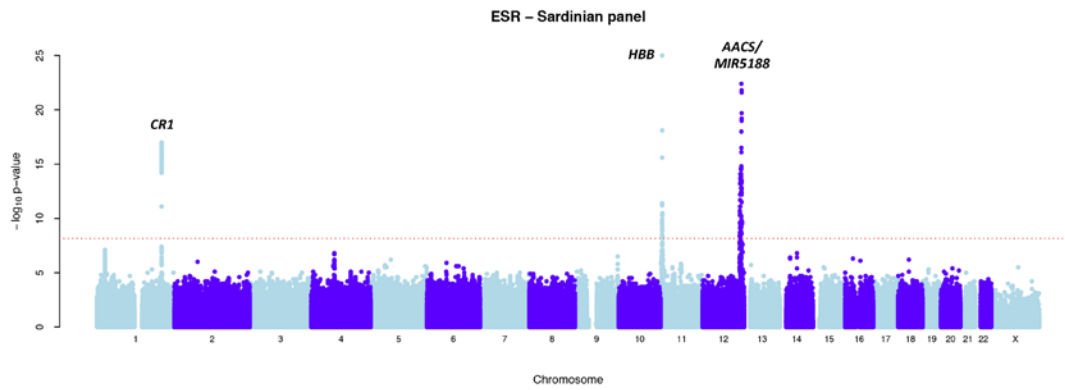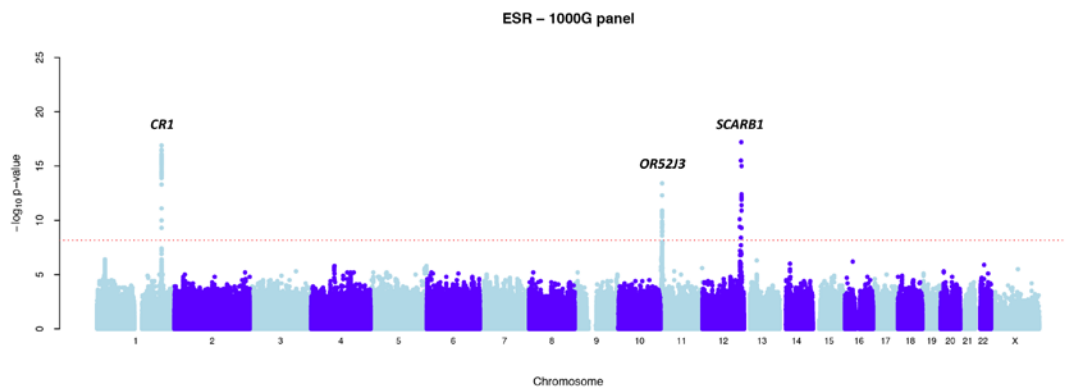

H)

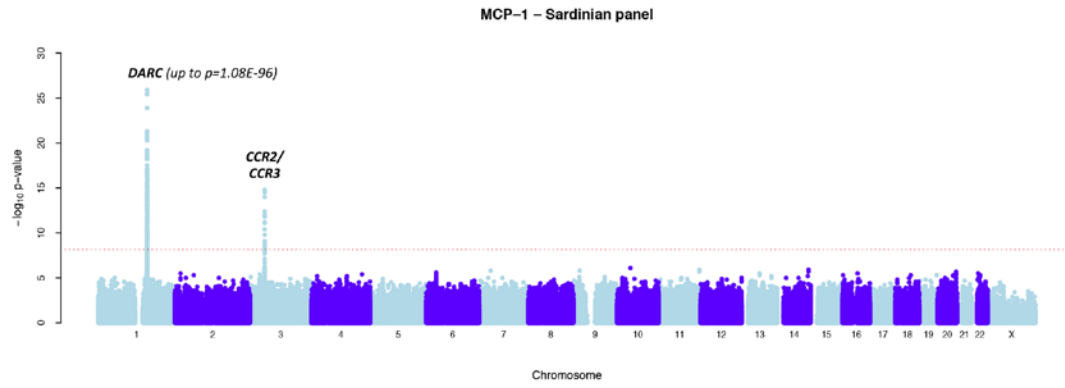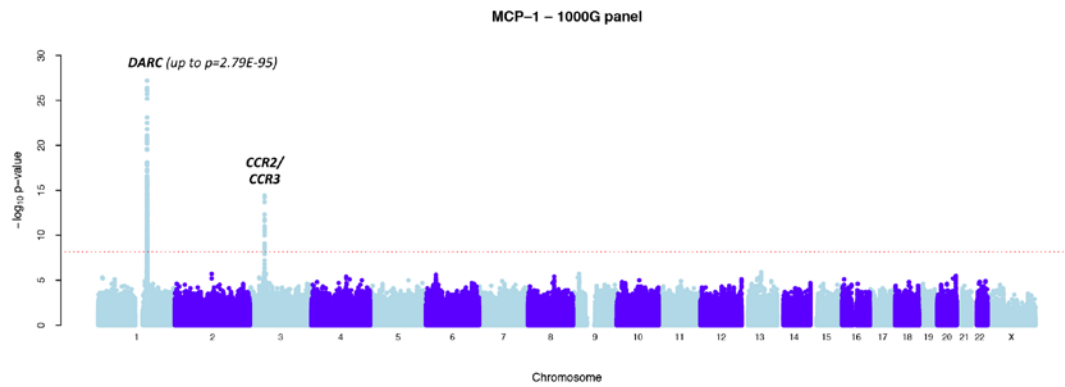

I)

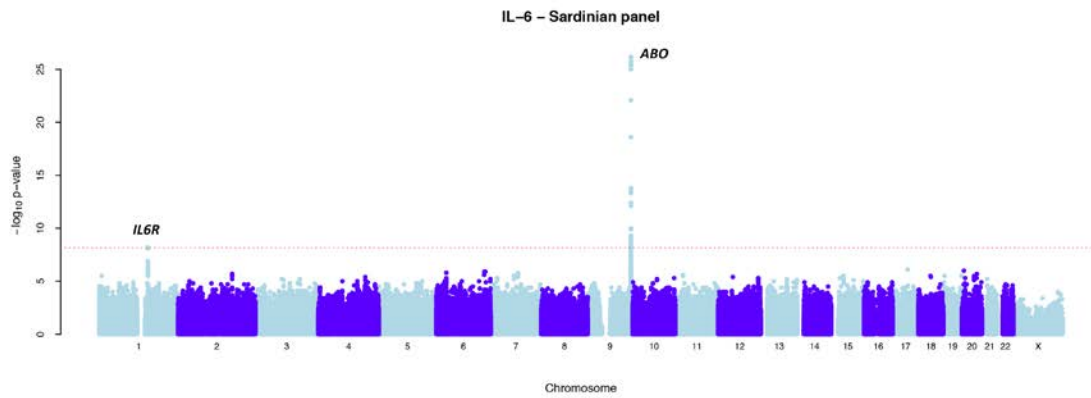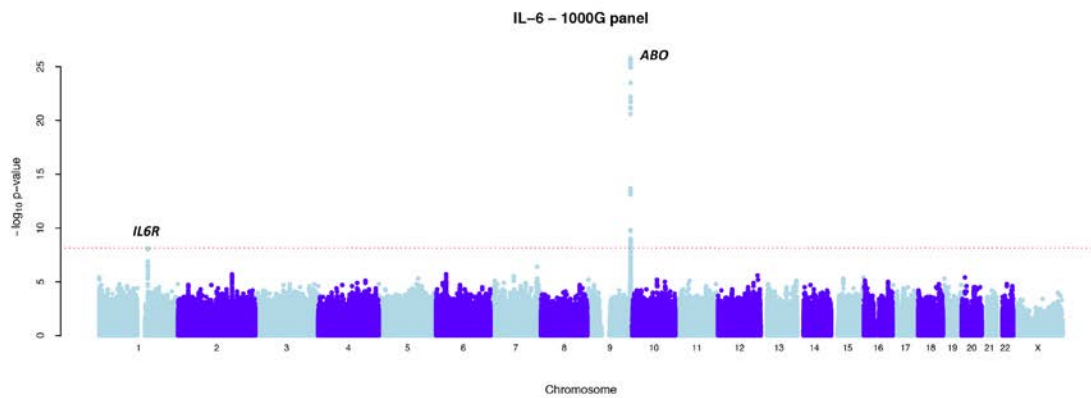

## SUPPLEMENTARY FIGURE 7. QQplots for all studied traits

The figure illustrates the quantile-quantile plot of observed pvalues versus those expected under the null distribution, separately for common SNPs (MAF>5%, red), low frequency SNPs (MAF>1% and <5%, blue) and rare SNPs (MAF<1%, orange). Grey bars represent 90% confidence intervals.

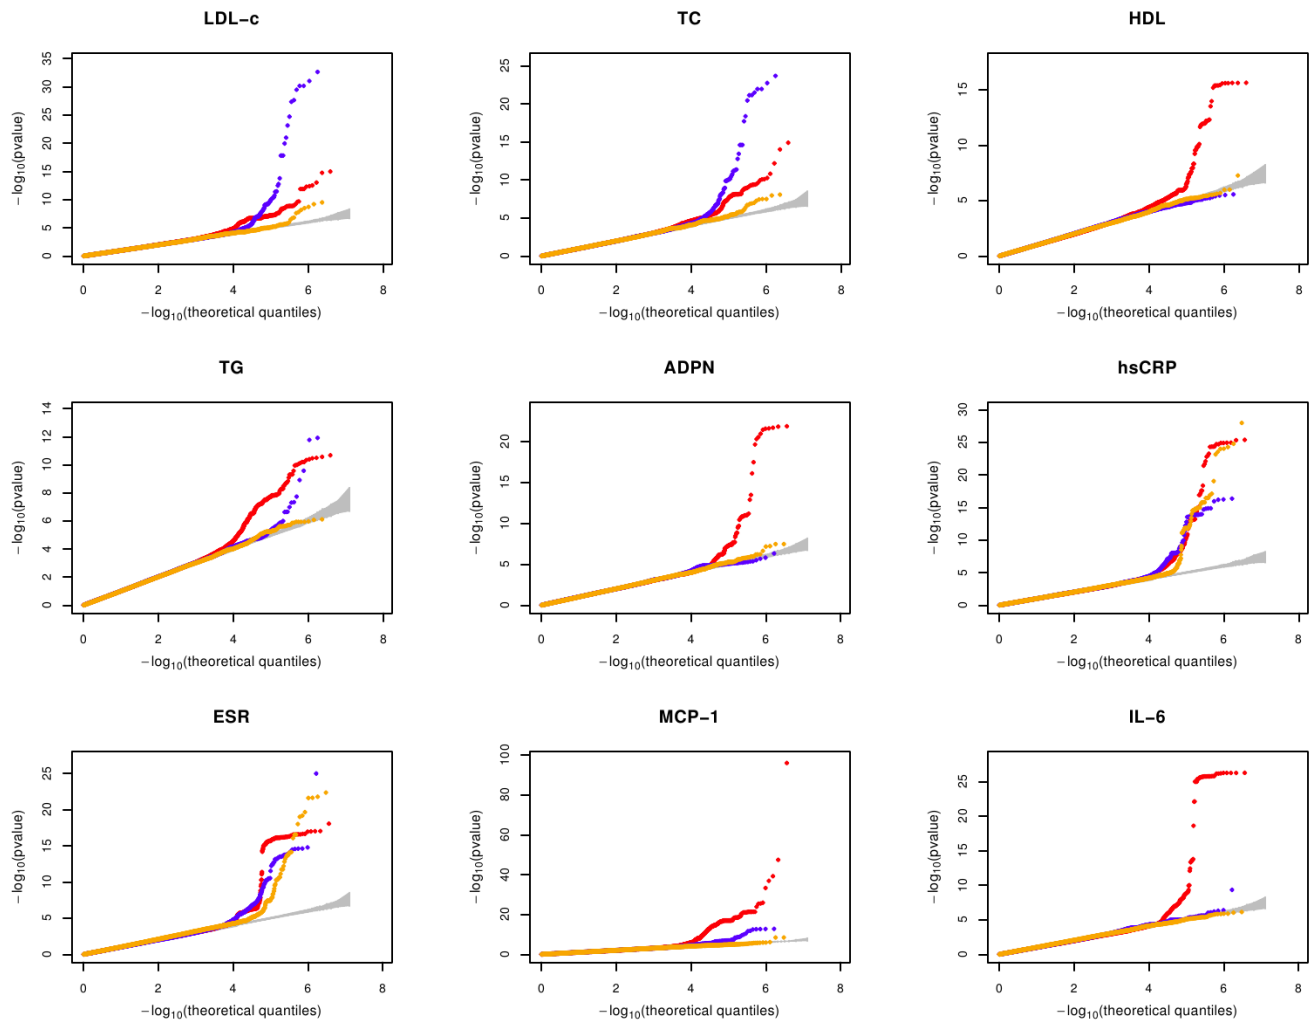

SUPPLEMENTARY FIGURE 8. Regional association plots

Regional association plots at the *ABDH13* locus for ADPN, at *PDGFRL* for hsCRP, and at *HBB* for ESR, for imputation performed using the Sardinian (panels A, C, E) and 1000 Genomes (panels B, D, F) reference panels, respectively. Figure style is identical to **Figure 3**.

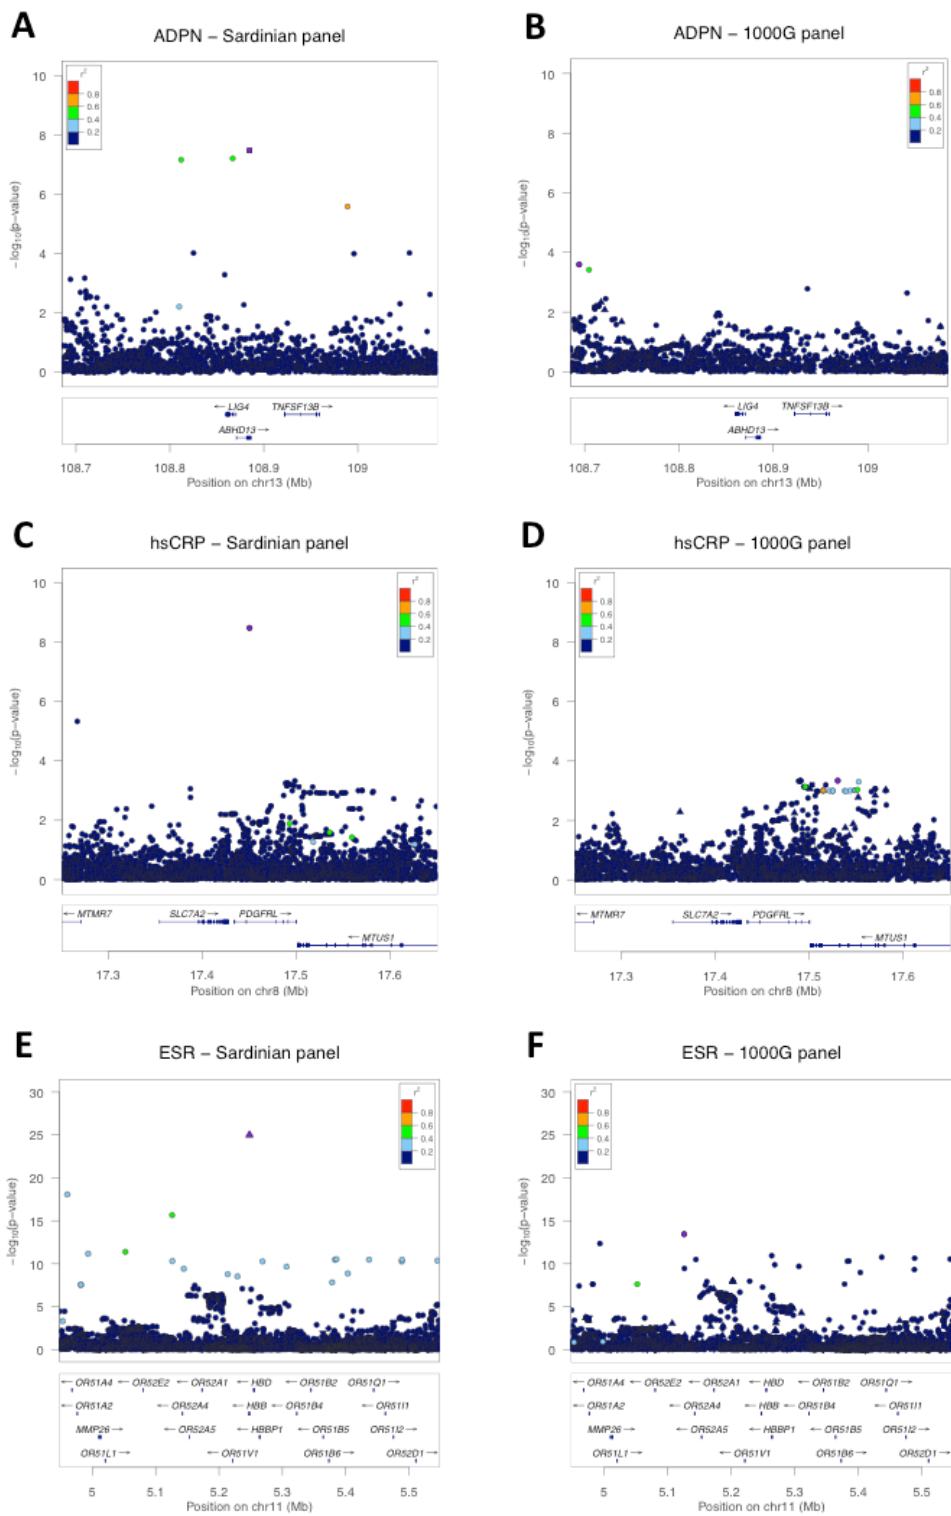

### SUPPLEMENTARY FIGURE 9. Extended associated region on chr12

Regional association plot of the 5.4Mb region on chr12. The results refer to association with hsCRP when the Sardinian panel is used for imputation. For a description of the figure style see Figure 3's legend.

### hsCRP – Sardinian panel

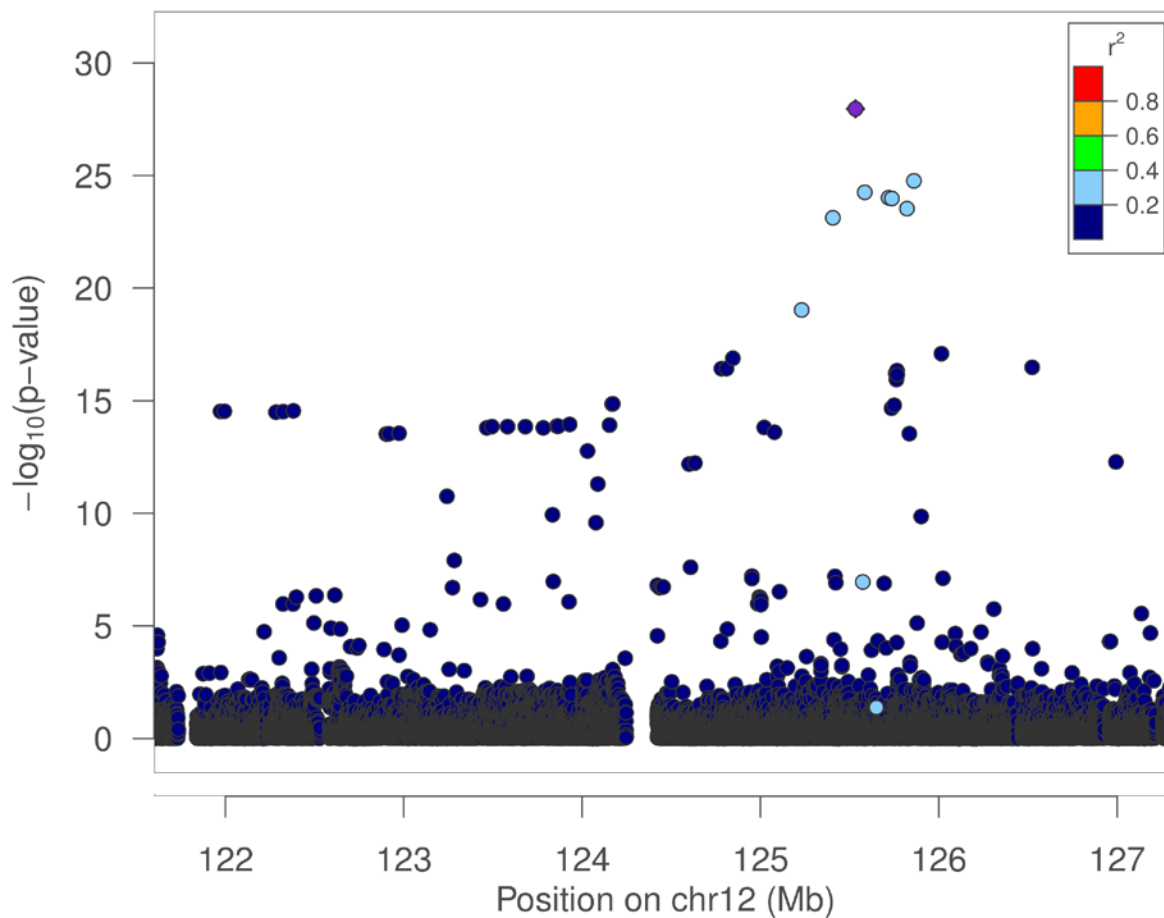

## SUPPLEMENTARY FIGURE 10. Variance explained by the accessible genome variants

In this plot, bars represent, for each assessed quantitative trait, the heritability and the variance explained by all variants in the accessible genome (see **Methods**), when the Sardinian or 1000 Genomes imputed data are considered (color coded blu and red, respectively). The white box indicates the estimated heritability in the SardiNIA sample.

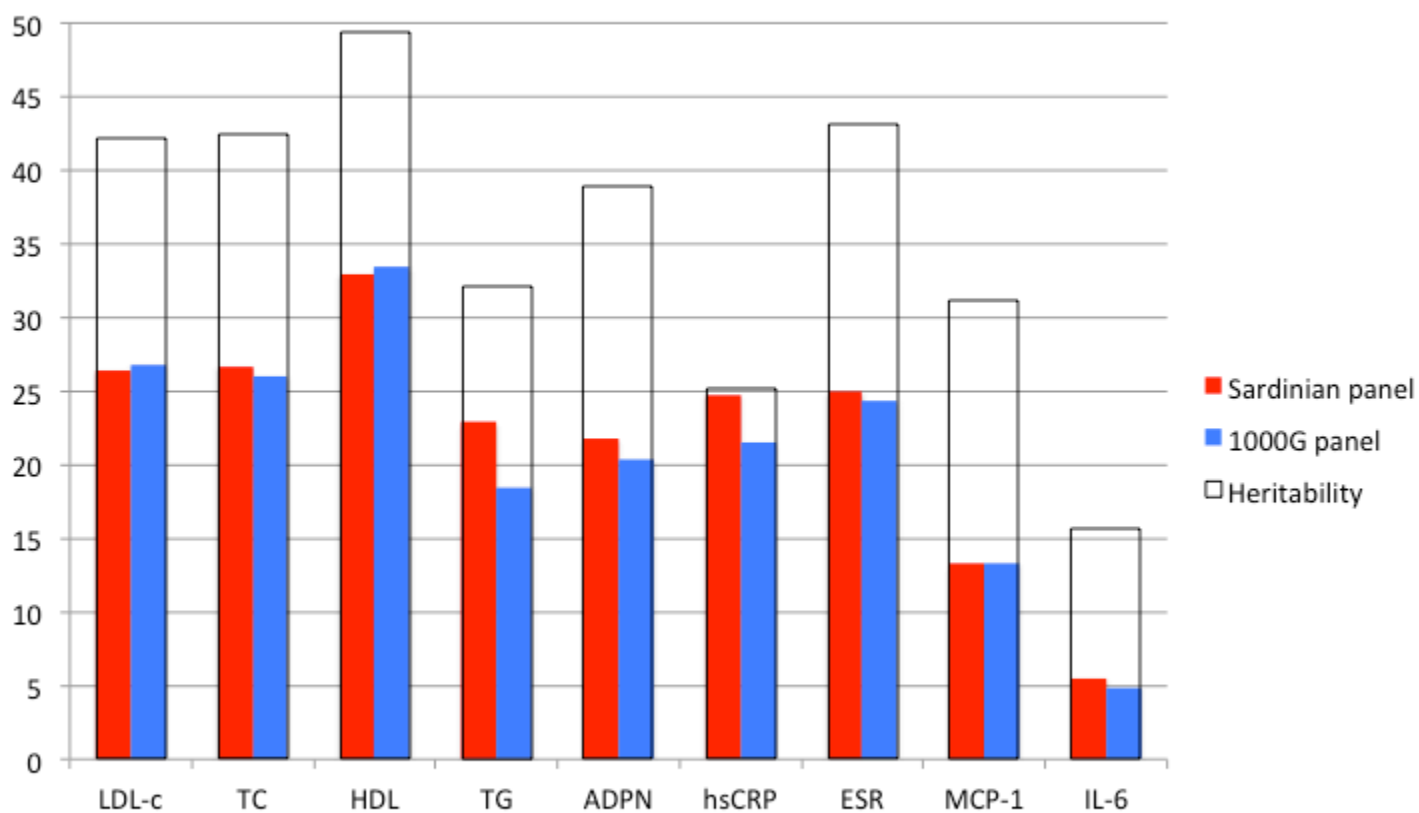

Supplement: 41588_2015_BFng3368_MOESM6_ESM.pdf [file 41588_2015_BFng3368_MOESM6_ESM.pdf]
